# Supplementary material
Source: PubMed Central journal article supplement (PMC2567817)

**Fig. S4a**

**C<sup>4</sup>-24S-ol-3-one 3-GP**

Sample\_502673\_2\_12

27/07/2007 16:41:49

sample

Sample\_502673\_2\_12 #797 RT: 7.82 AV: 1 NL: 1.83E3  
F: ITMS + c ESI d Full ms2 534.41@cid30.00 [135.00-545.00]

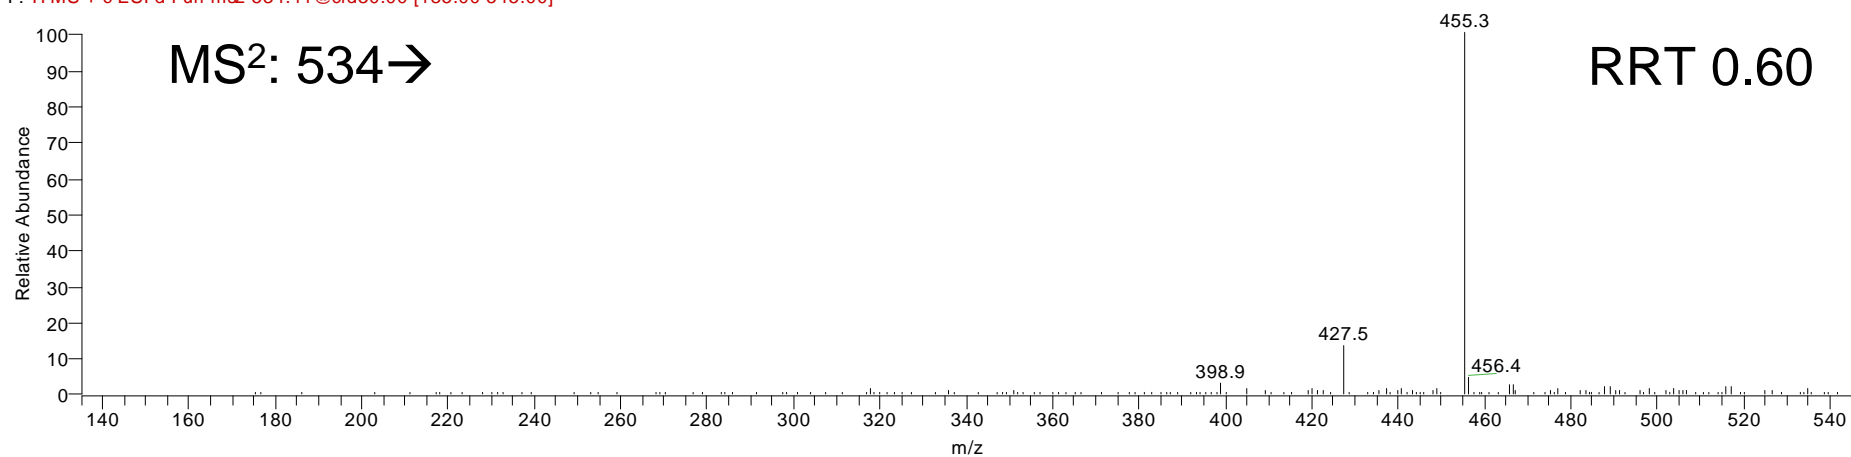

sample\_12 #761 RT: 7.58 AV: 1 NL: 3.41E5  
F: ITMS + c ESI d Full ms2 534.41@cid30.00 [135.00-545.00]

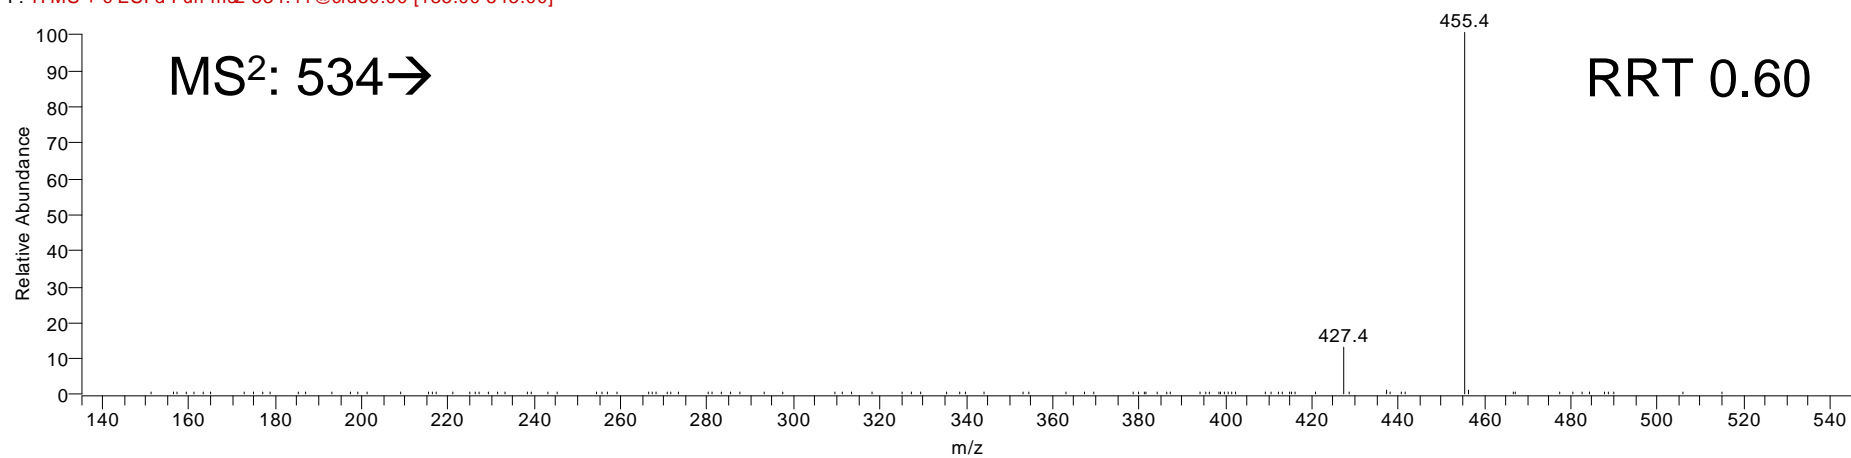

**Fig. S4b**

# C<sup>4</sup>-24S-ol-3-one 3-GP

Sample\_502673\_2\_12

27/07/2007 16:41:49

sample

Sample\_502673\_2\_12 #798 RT: 7.82 AV: 1 NL: 2.71E2  
F: ITMS + c ESI d Full ms3 534.41@cid30.00 455.27@cid35.00 [115.00-470.00]

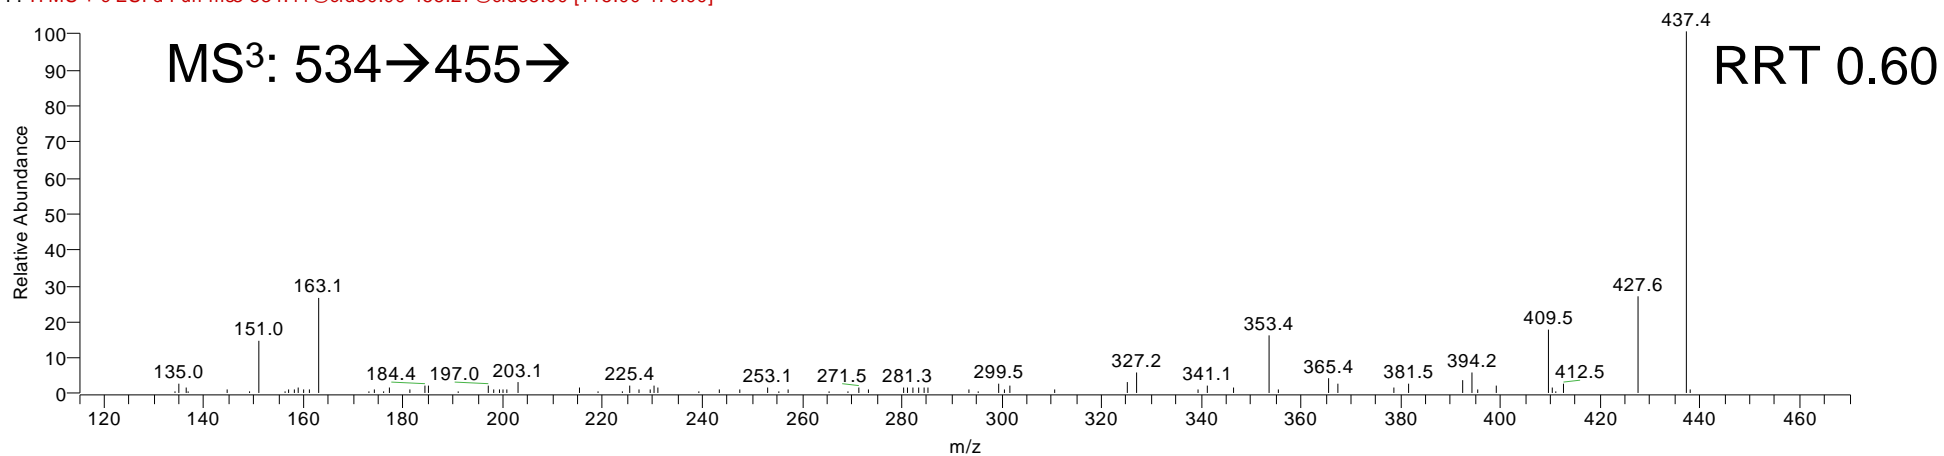

sample\_12 #762 RT: 7.58 AV: 1 NL: 3.58E4  
F: ITMS + c ESI d Full ms3 534.41@cid30.00 455.31@cid35.00 [115.00-470.00]

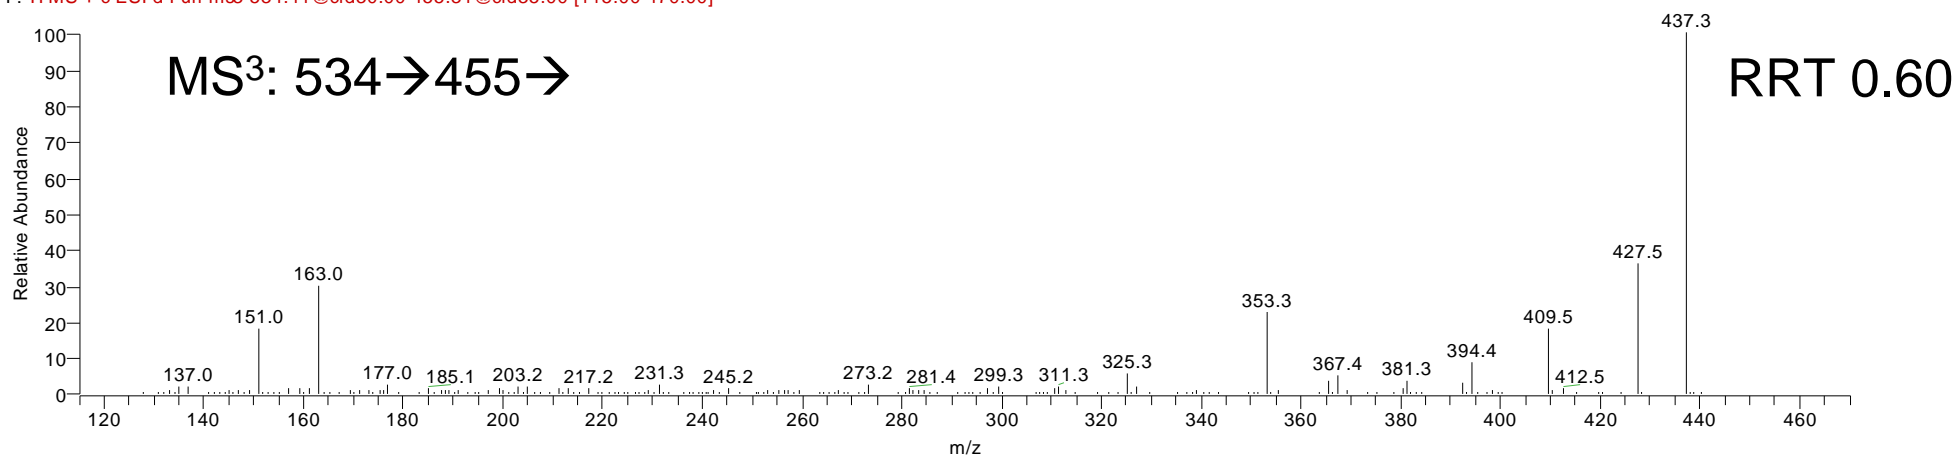

**Fig. S4c**

**C<sup>4</sup>-27-ol-3-one 3-GP**

c:\documents and settings\...\sample\_14

28/07/2007 02:38:02

sample

Sample\_502673\_2\_12 #853 RT: 8.33 AV: 1 NL: 2.64E3  
F: ITMS + c ESI d Full ms2 534.41@cid30.00 [135.00-545.00]

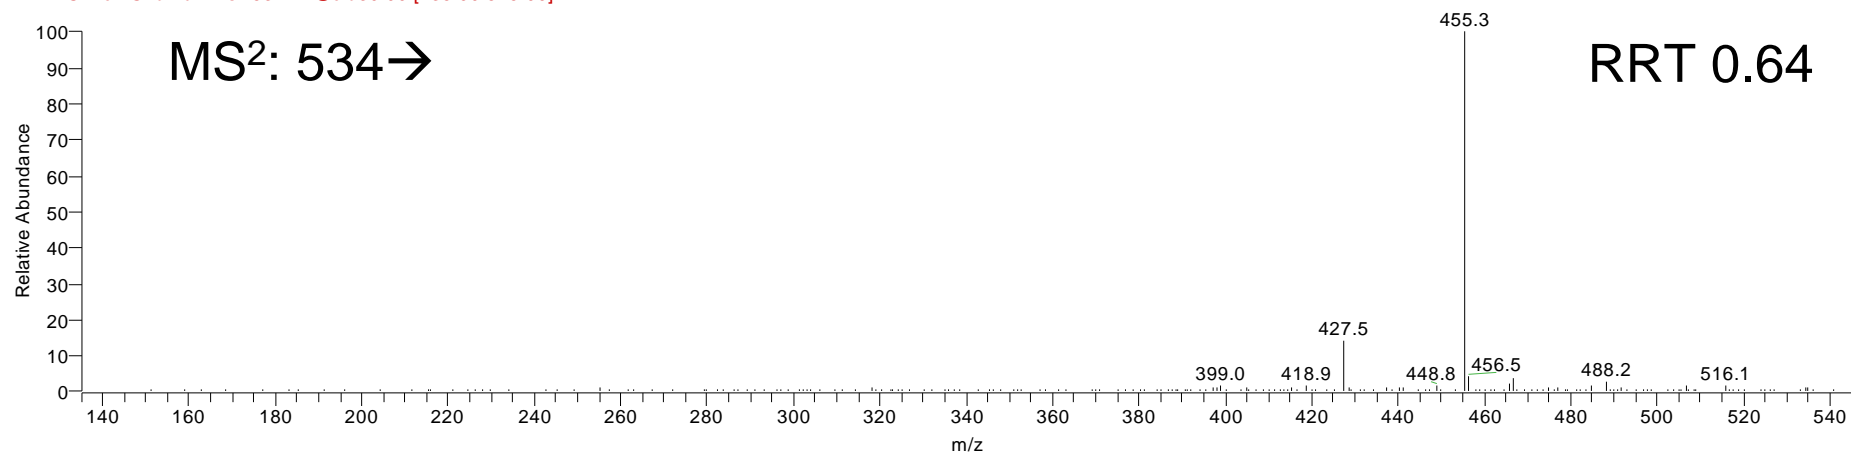

sample\_14 #811 RT: 8.00 AV: 1 NL: 9.57E5  
F: ITMS + c ESI d Full ms2 534.41@cid30.00 [135.00-545.00]

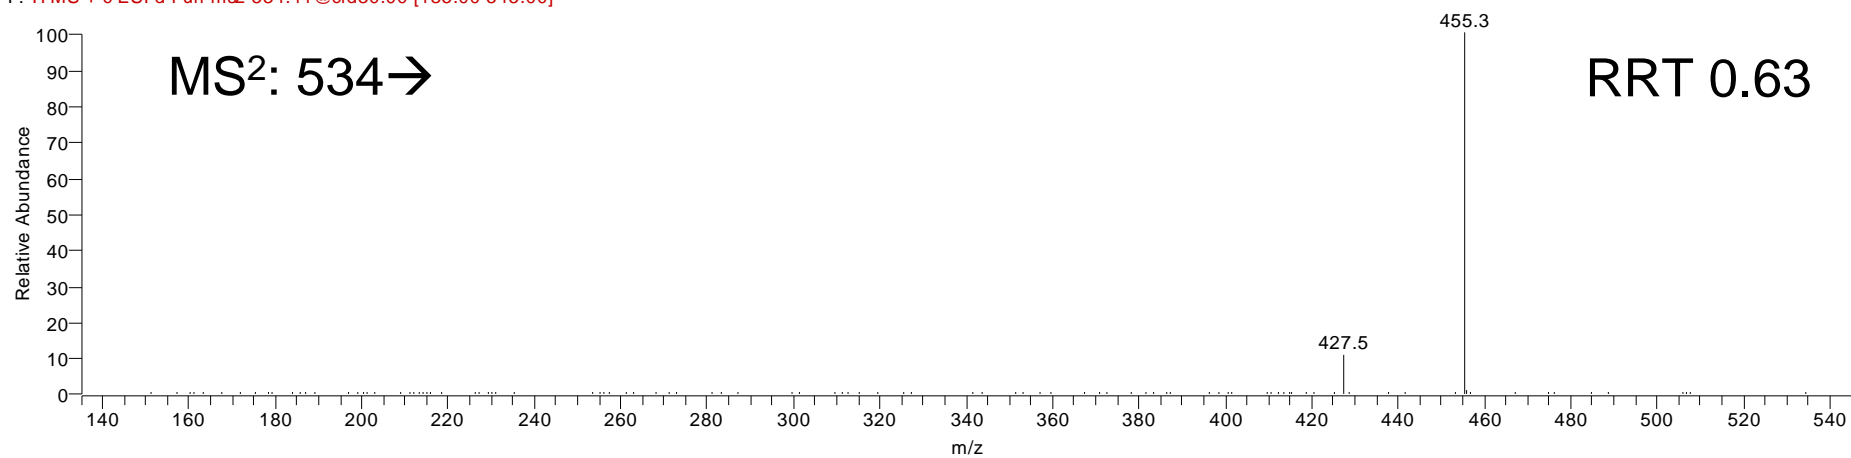

**Fig. S4d****C<sup>4</sup>-27-ol-3-one 3-GP**

c:\documents and settings\...\sample\_14

28/07/2007 02:38:02

sample

Sample\_502673\_2\_12 #854 RT: 8.34 AV: 1 NL: 1.67E2  
F: ITMS + c ESI d Full ms3 534.41@cid30.00 455.27@cid35.00 [115.00-470.00]

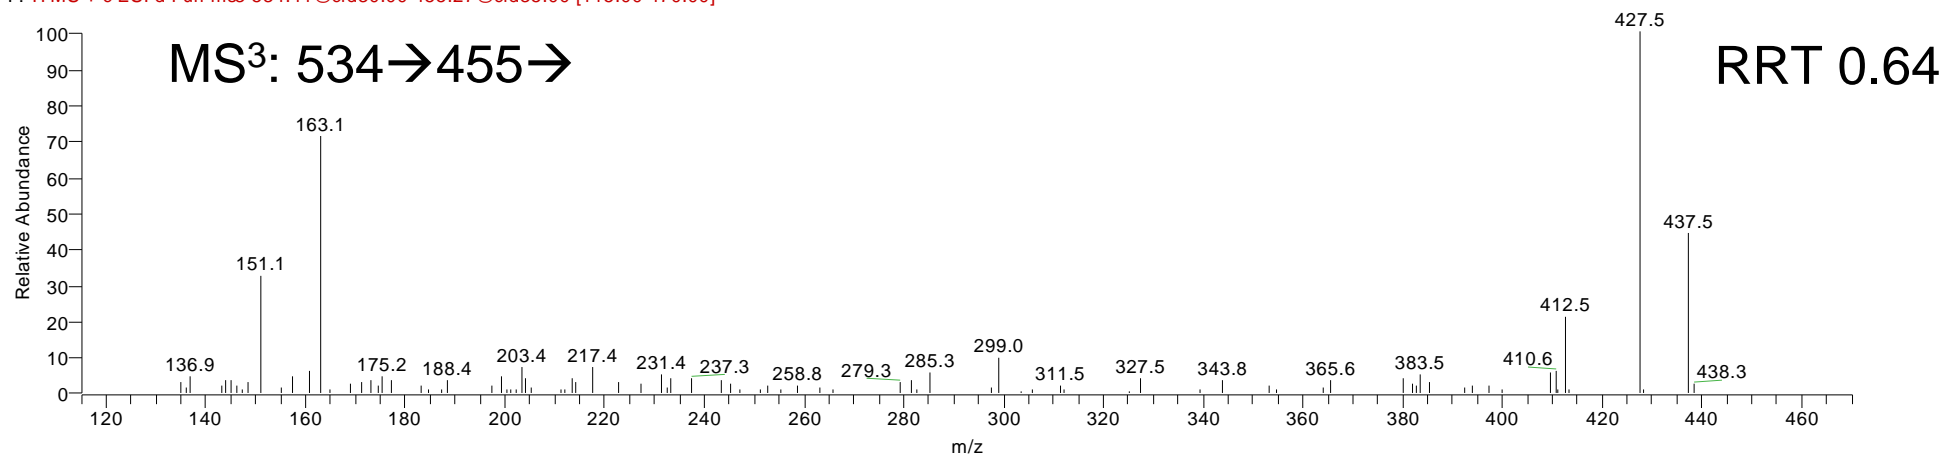

sample\_14 #812 RT: 8.00 AV: 1 NL: 7.54E4  
F: ITMS + c ESI d Full ms3 534.40@cid30.00 455.44@cid35.00 [115.00-470.00]

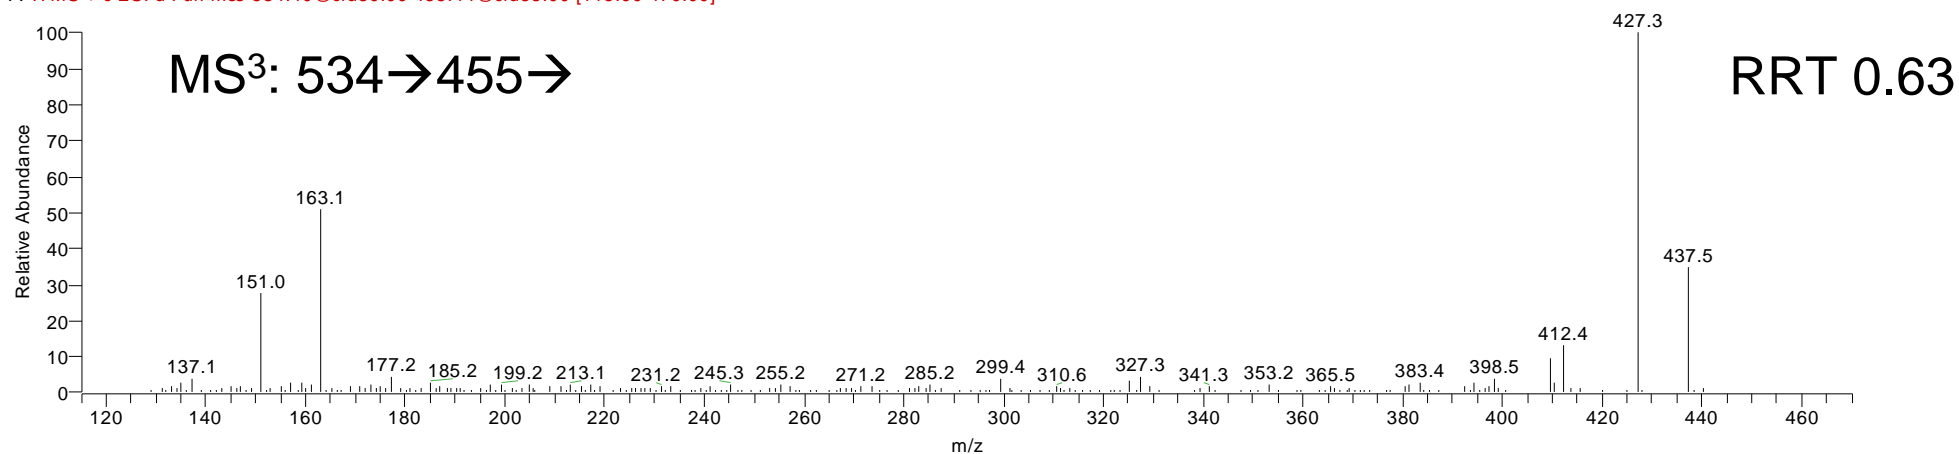

**Fig. S4e**

**C<sup>4</sup>-7 $\alpha$ -ol-3-one 3-GP**

Sample\_502673\_2\_12

27/07/2007 16:41:49

sample

Sample\_502673\_2\_12 #1073 RT: 10.20 AV: 1 NL: 1.01E3  
F: ITMS + c ESI d Full ms2 534.41@cid30.00 [135.00-545.00]

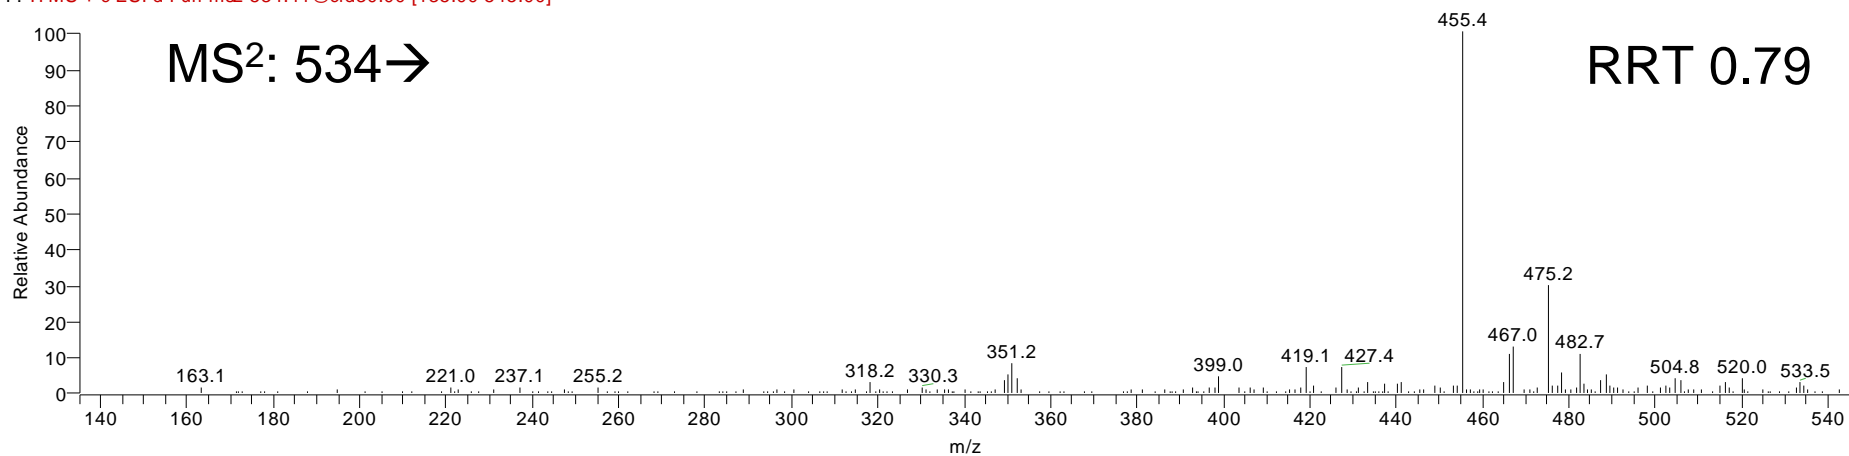

sample\_20 #1015 RT: 10.06 AV: 1 NL: 2.85E5  
F: ITMS + c ESI d Full ms2 534.41@cid30.00 [135.00-545.00]

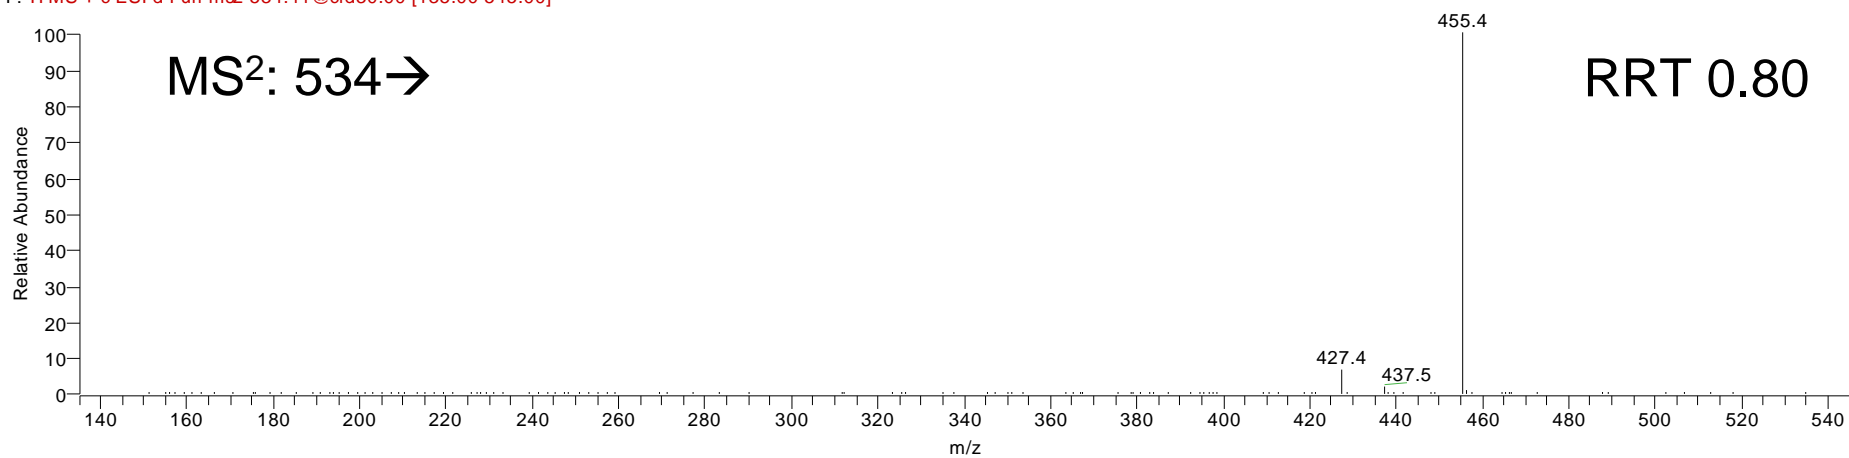

**Fig. S4f**

**C<sup>4</sup>-7 $\alpha$ -ol-3-one 3-GP**

Sample\_502673\_2\_12

27/07/2007 16:41:49

sample

Sample\_502673\_2\_12 #1074 RT: 10.21 AV: 1 NL: 1.39E2  
F: ITMS + c ESI d Full ms3 534.41@cid30.00 455.27@cid35.00 [115.00-470.00]

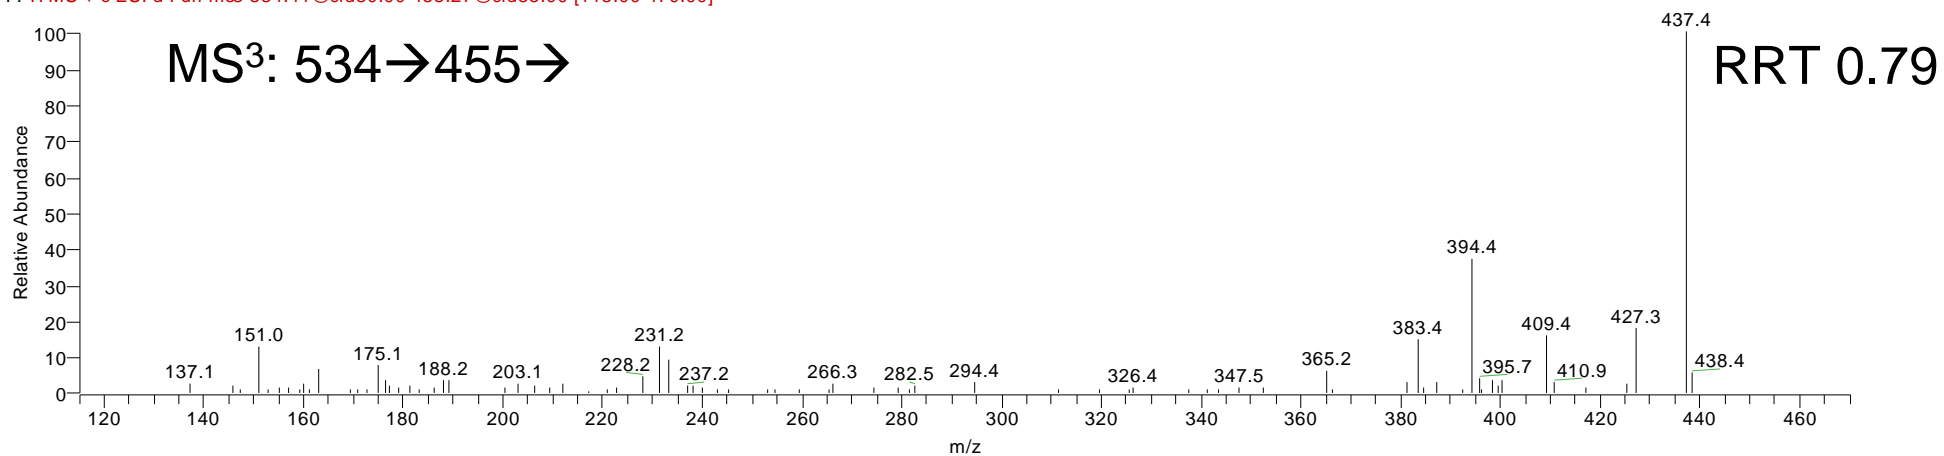

sample\_20 #1016 RT: 10.06 AV: 1 NL: 4.06E4  
F: ITMS + c ESI d Full ms3 534.41@cid30.00 455.29@cid35.00 [115.00-470.00]

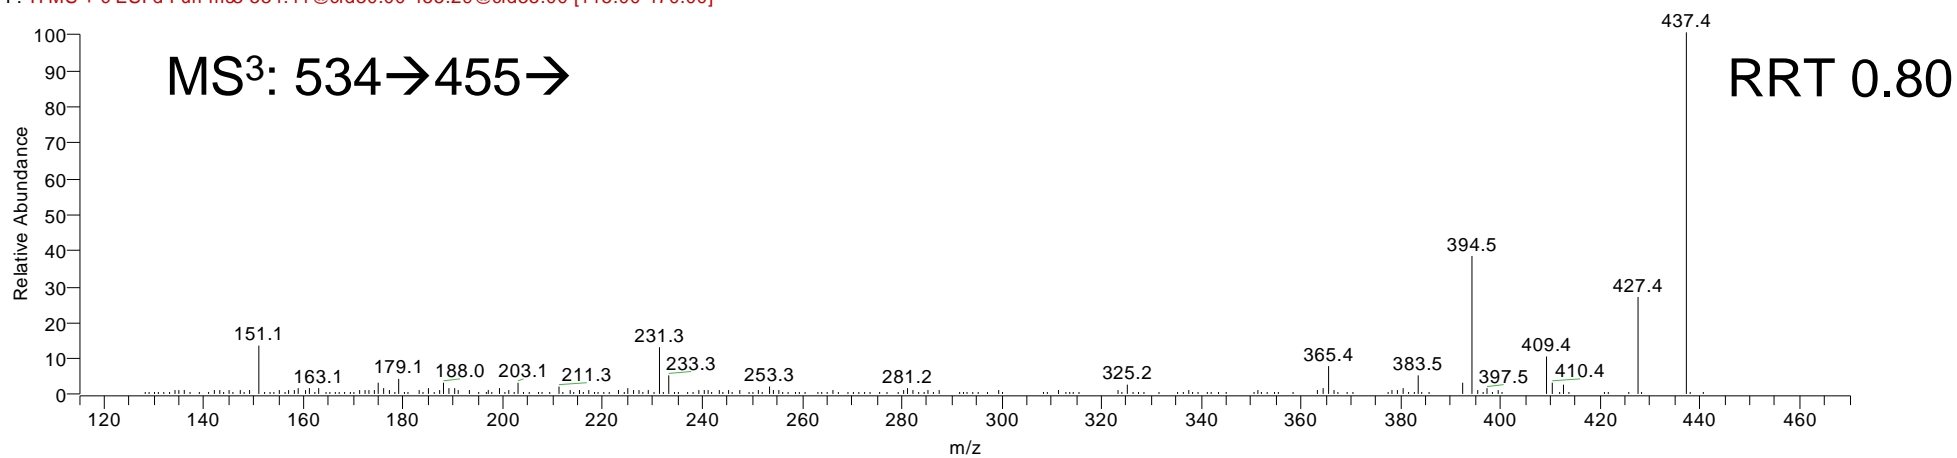

**Fig. S4g**

**C<sup>4</sup>-6β-ol-3-one 3-GP**

c:\documents and settings\...\esi\_std04

04/05/2006 03:05:04

Sample\_502673\_2\_12 #1136 RT: 10.68 AV: 1 NL: 7.12E2  
F: ITMS + c ESI d Full ms2 534.41@cid30.00 [135.00-545.00]

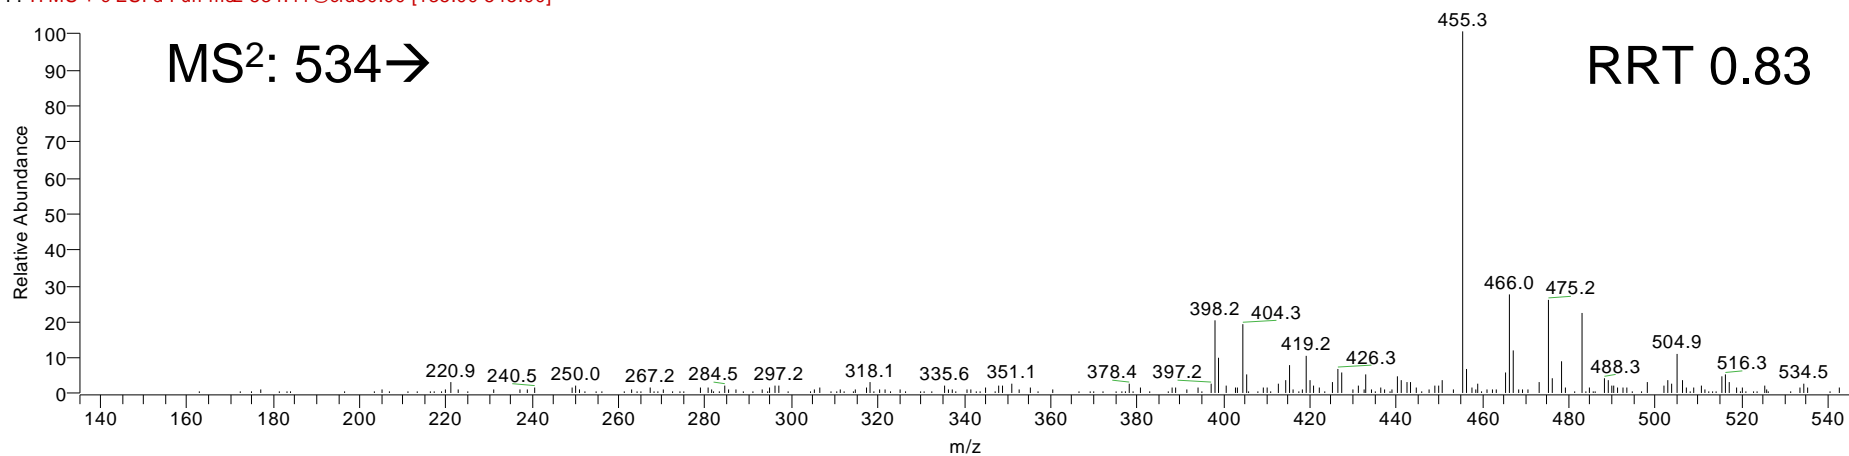

esi\_std04 #1236 RT: 10.53 AV: 1 NL: 2.62E6  
F: ITMS + c ESI d Full ms2 534.41@cid30.00 [135.00-545.00]

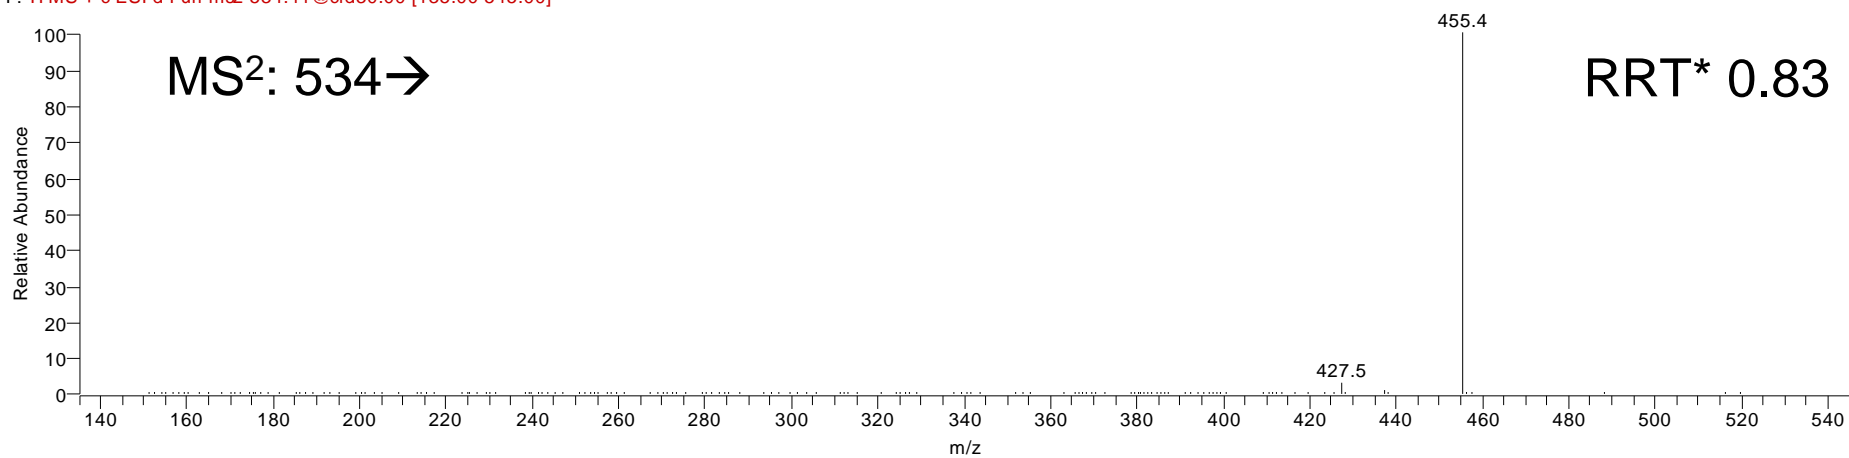

**Fig. S4h****C<sup>4</sup>-6 $\beta$ -ol-3-one 3-GP**

Sample\_502673\_2\_12

27/07/2007 16:41:49

sample

Sample\_502673\_2\_12 #1137 RT: 10.69 AV: 1 NL: 6.61E1  
F: ITMS + c ESI d Full ms3 534.41@cid30.00 455.27@cid35.00 [115.00-470.00]

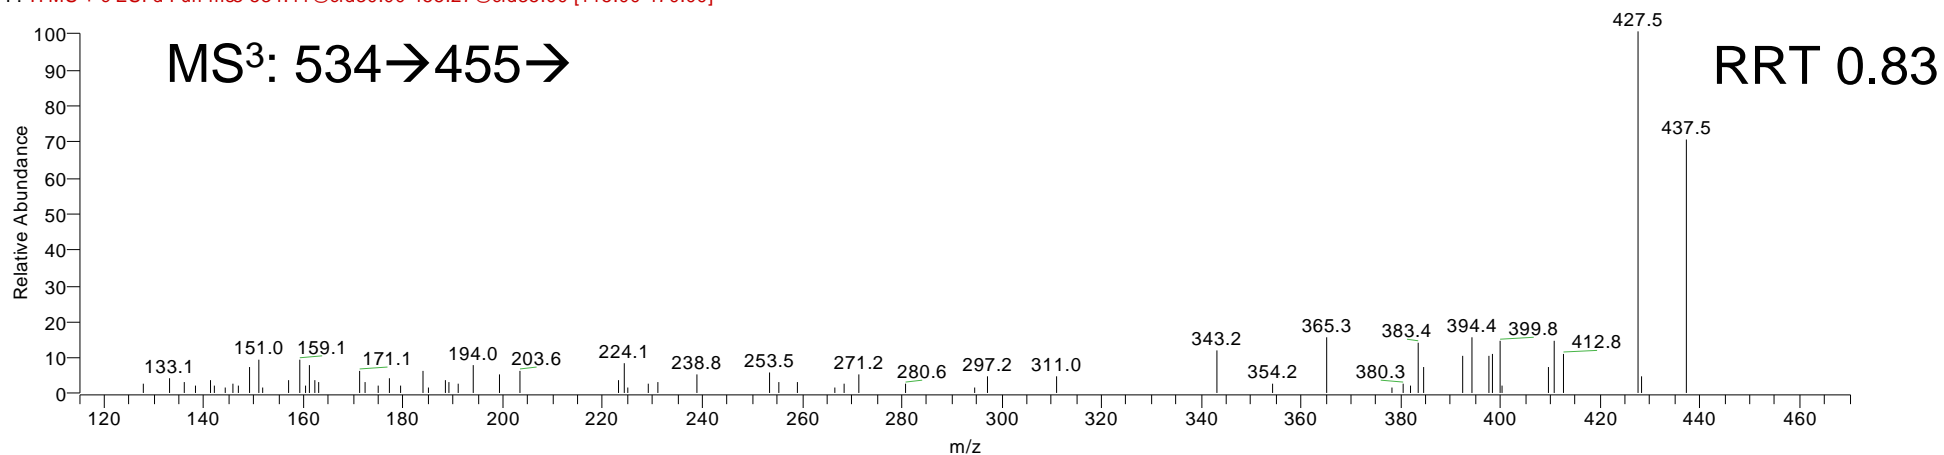

esi\_std04 #1237 RT: 10.54 AV: 1 NL: 2.20E5  
F: ITMS + c ESI d Full ms3 534.40@cid30.00 455.35@cid30.00 [115.00-470.00]

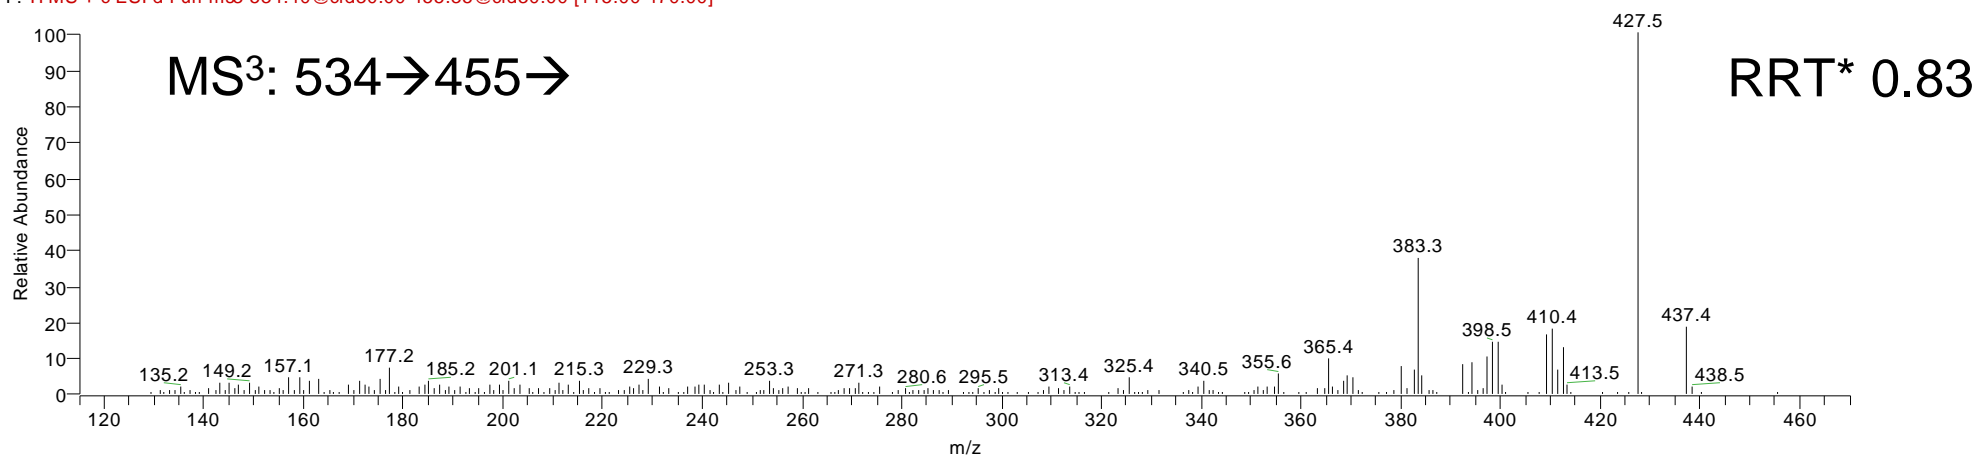



**Fig. S4i****C<sup>4</sup>-7 $\alpha$ ,27-diol-3-one 3-GP**

c:\documents and settings\...\26

01/07/2006 09:55:11

Sample\_502673\_2\_12 #689 RT: 6.79 AV: 1 NL: 3.89E2  
F: ITMS + c ESI d Full ms2 550.40@cid30.00 [140.00-565.00]

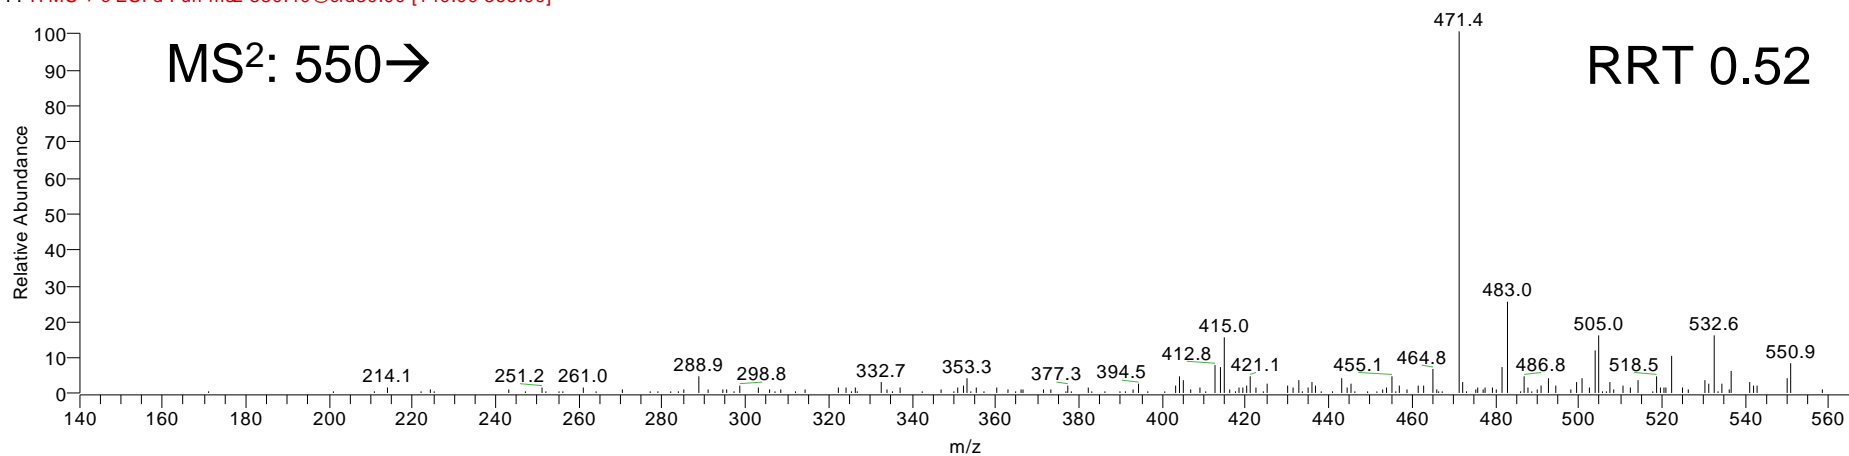

26 #754 RT: 6.34 AV: 1 NL: 8.41E4  
F: ITMS + c ESI d Full ms2 550.40@cid35.00 [140.00-565.00]

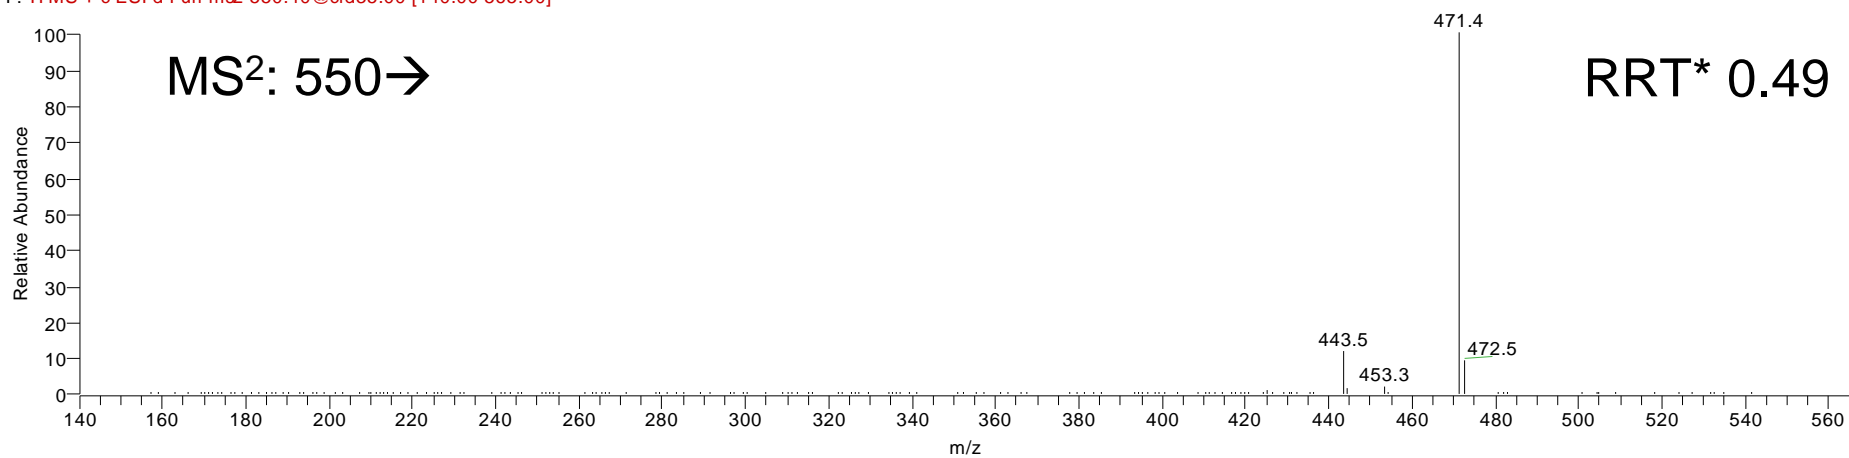

**Fig. S4j****C<sup>4</sup>-7 $\alpha$ ,27-diol-3-one 3-GP**

Sample\_502673\_2\_12

27/07/2007 16:41:49

sample

Sample\_502673\_2\_12 #676 RT: 6.67 AV: 1 NL: 5.09E1

F: ITMS + c ESI d Full ms3 550.40@cid30.00 471.38@cid35.00 [115.00-485.00]

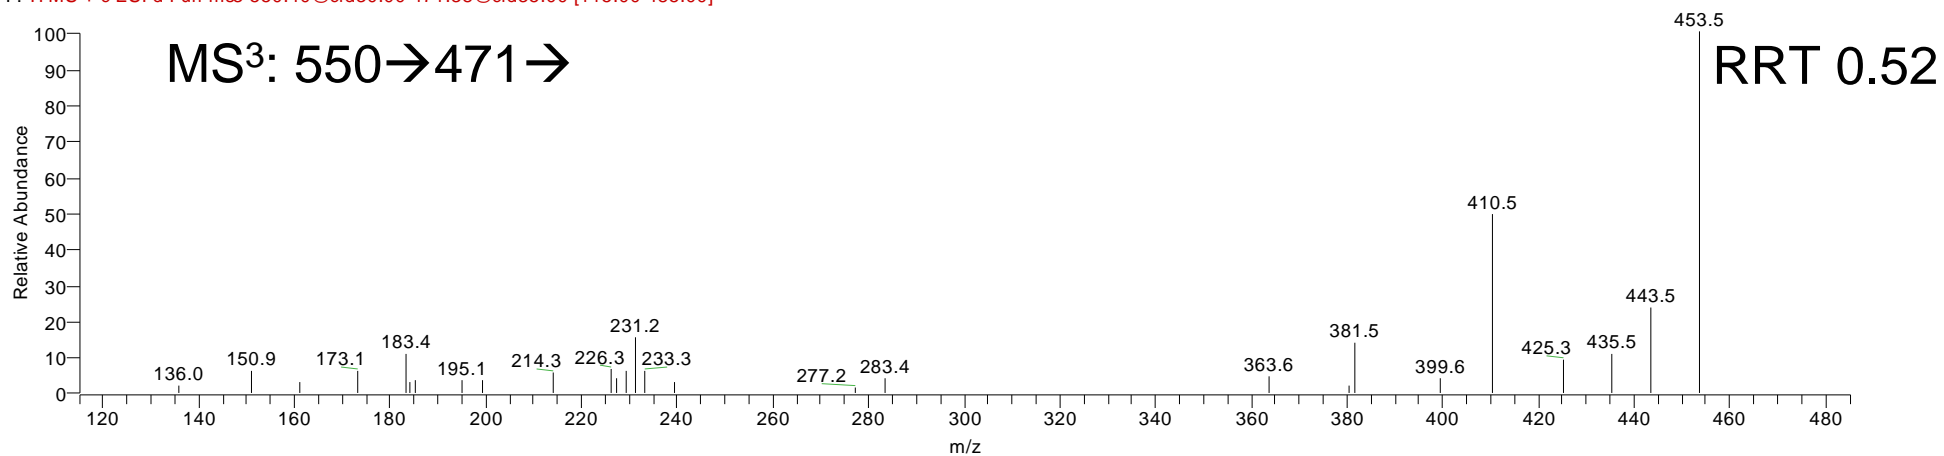

26 #755 RT: 6.35 AV: 1 NL: 9.10E3

F: ITMS + c ESI d Full ms3 550.40@cid35.00 471.31@cid35.00 [115.00-485.00]

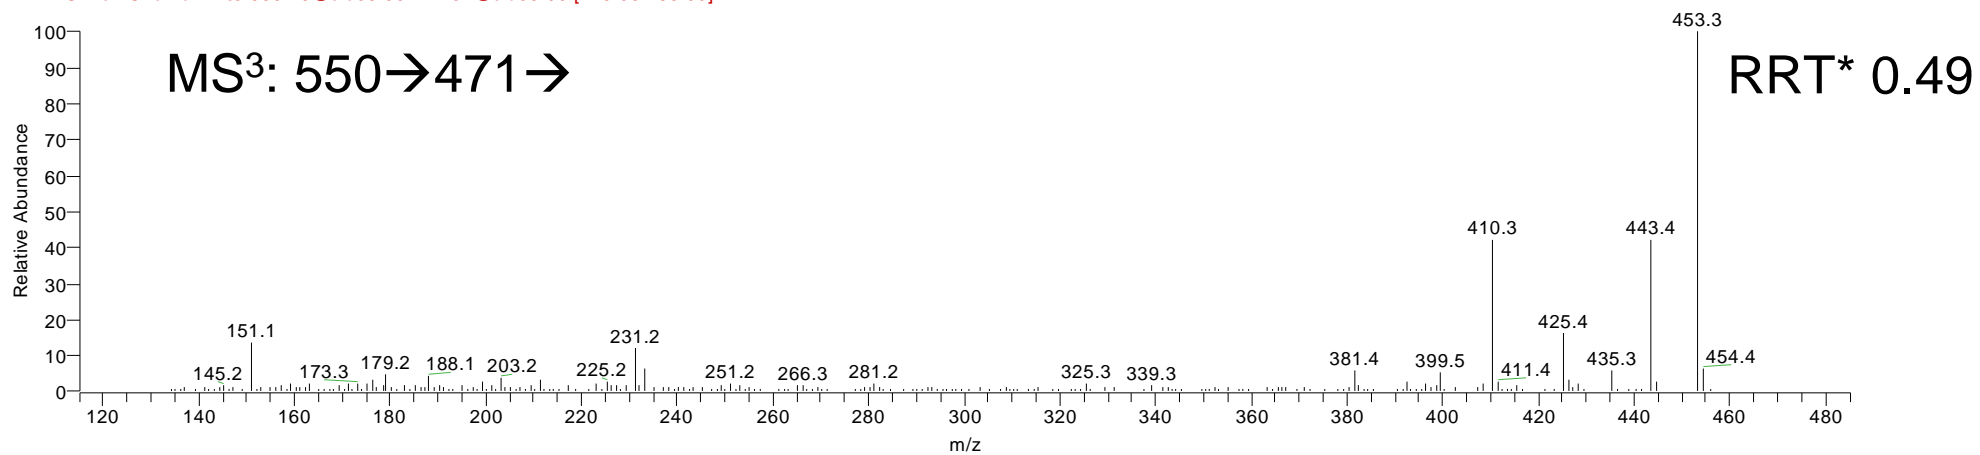

Supplement: NIHMS2295-supplement-Figure_S4.pdf [file NIHMS2295-supplement-Figure_S4.pdf]
