# Supplementary material
Source: PubMed Central journal article supplement (PMC2567817)

**Fig. S8a****aldol 6-GP**

Sample\_502673\_2\_12

27/07/2007 16:41:49

sample

Sample\_502673\_2\_12 #1076 RT: 10.22 AV: 1 NL: 3.94E2  
F: ITMS + c ESI d Full ms2 552.42@cid30.00 [140.00-565.00]

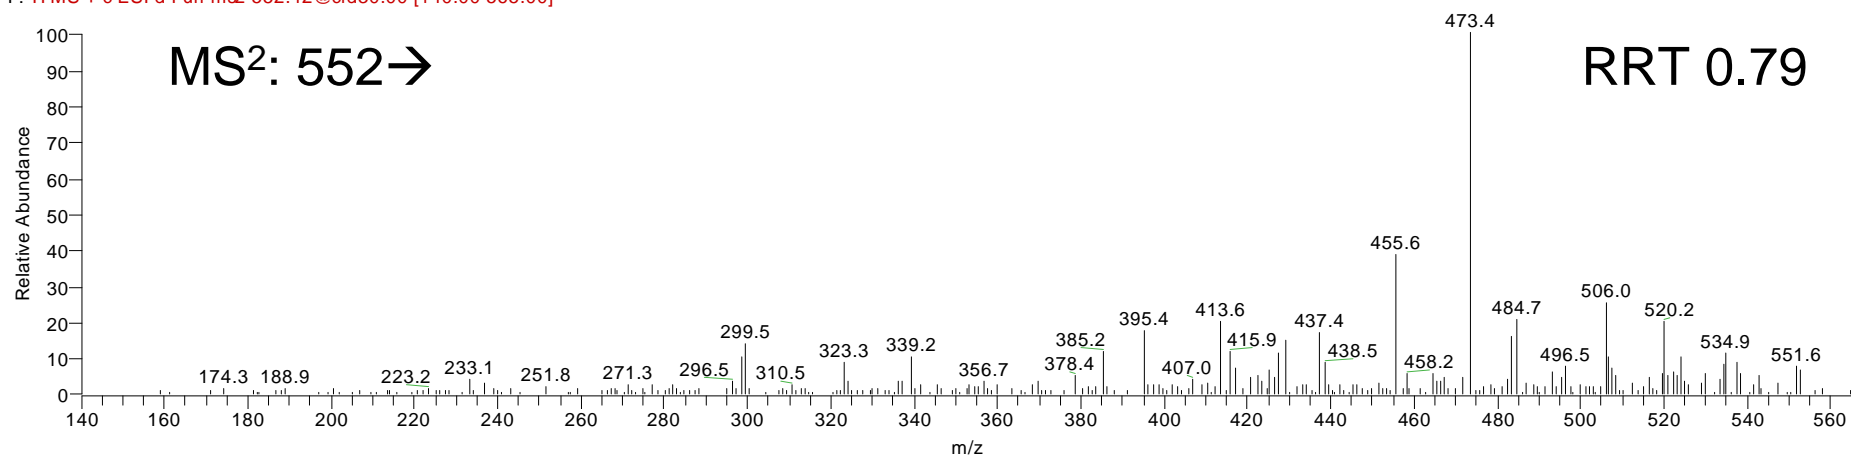

esi\_std28 #1173 RT: 9.94 AV: 1 NL: 1.61E6  
F: ITMS + c ESI d Full ms2 552.41@cid30.00 [140.00-565.00]

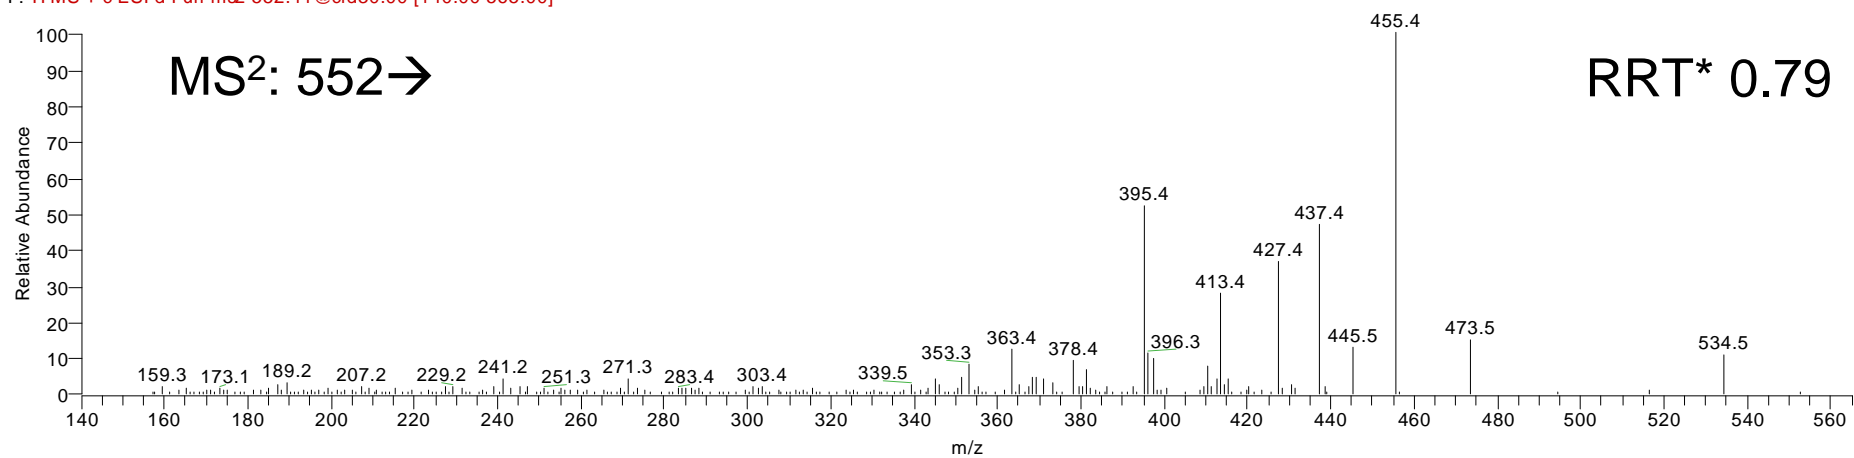

**Fig. S8b**

aldol 6-GP

Sample\_502673\_2\_12

27/07/2007 16:41:49

sample

Sample\_502673\_2\_12 #1076 RT: 10.22 AV: 1 NL: 1.51E2  
F: ITMS + c ESI d Full ms2 552.42@cid30.00 [140.00-565.00]

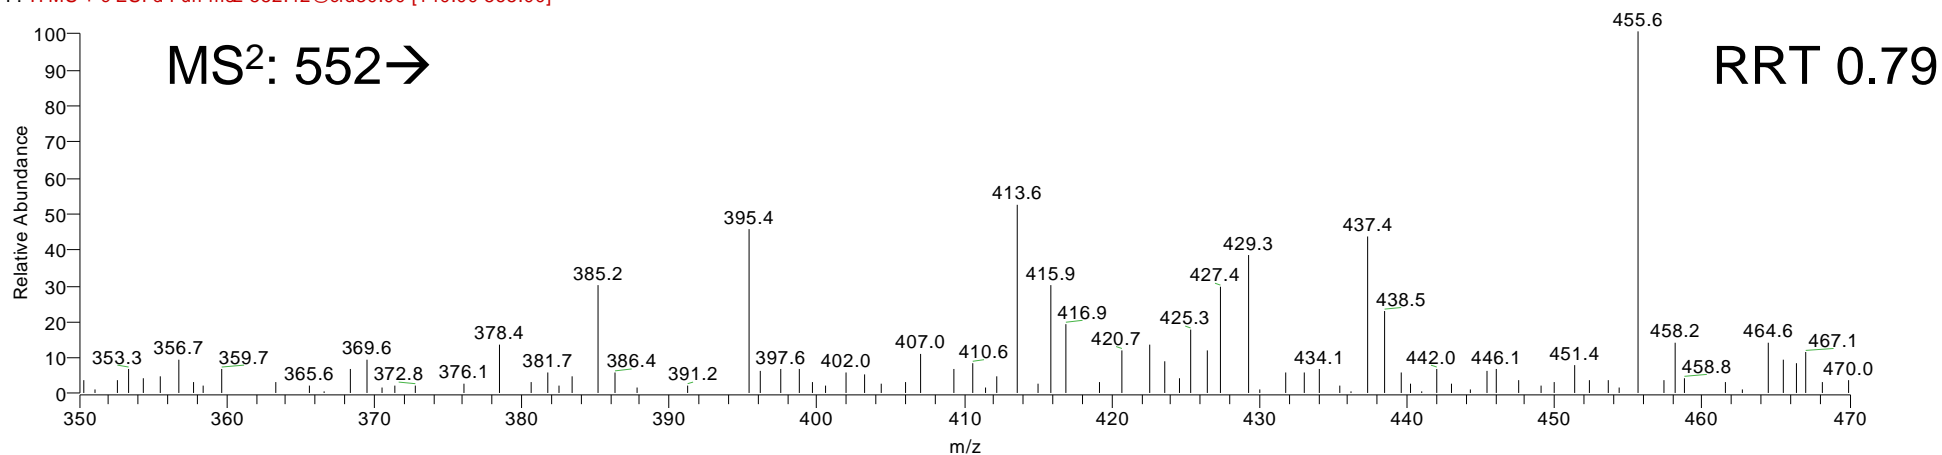

esi\_std28 #1173 RT: 9.94 AV: 1 NL: 1.61E6  
F: ITMS + c ESI d Full ms2 552.41@cid30.00 [140.00-565.00]

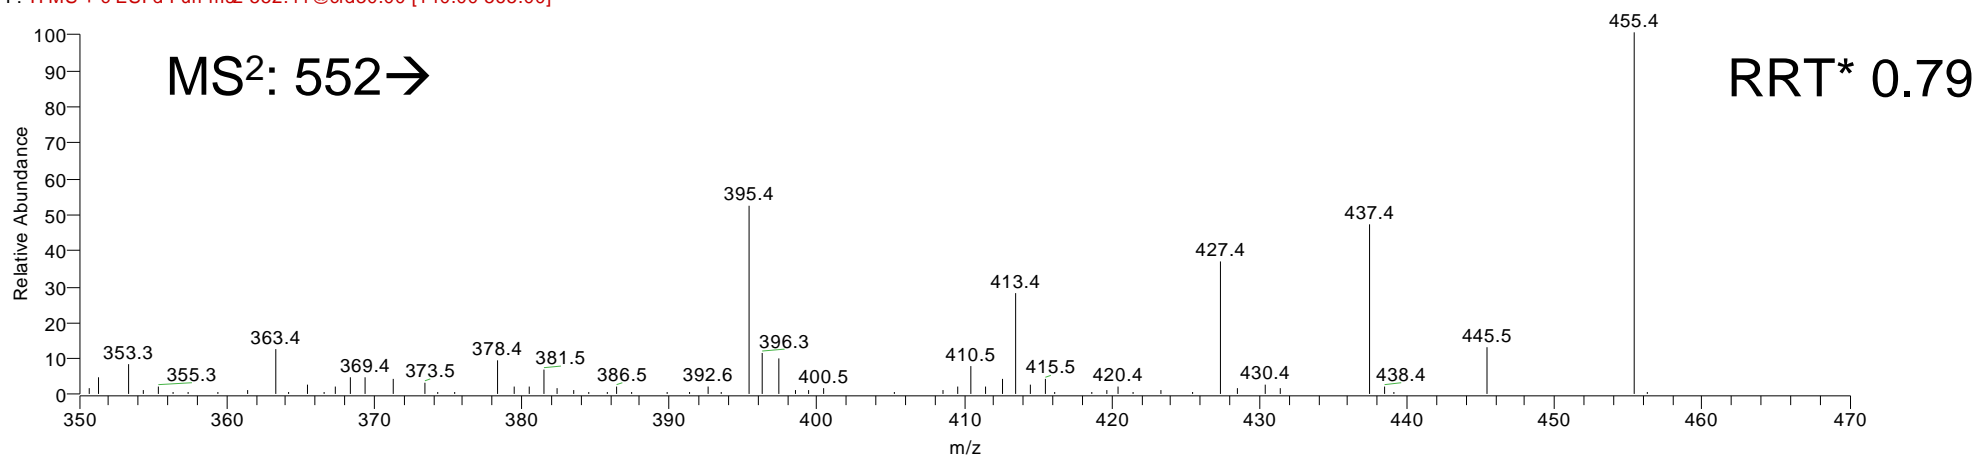

Supplement: NIHMS2295-supplement-Figure_S8.pdf [file NIHMS2295-supplement-Figure_S8.pdf]
