# Supplementary material
Source: PubMed Central journal article supplement (PMC2567817)

**Fig. S10****A-3-ol-17-one 3-GlcA 17-GP**

Sample\_502673\_2\_11\_x2

27/07/2007 15:46:16

sample

Sample\_502673\_2\_11\_x2 #139 RT: 1.34 AV: 1 NL: 5.06E3

F: ITMS + c ESI d Full ms2 600.33@cid30.00 [155.00-615.00]

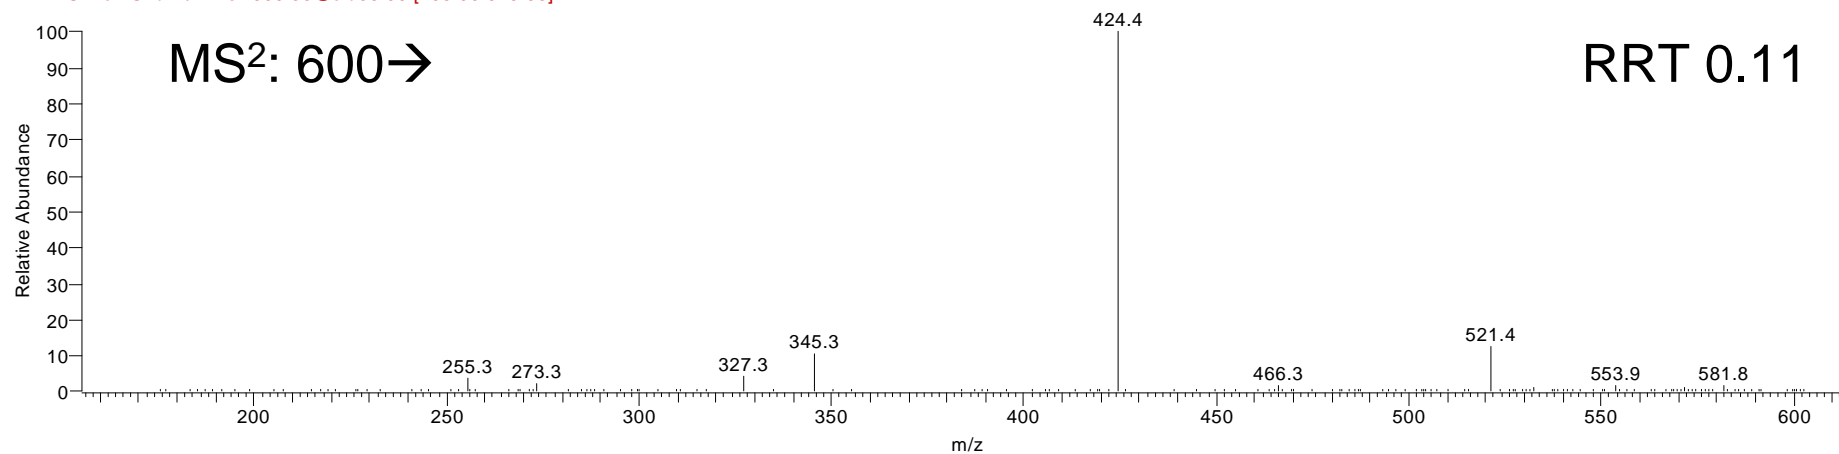

Sample\_502673\_2\_11\_x2 #140 RT: 1.35 AV: 1 NL: 1.52E2

F: ITMS + c ESI d Full ms3 600.33@cid30.00 521.34@cid35.00 [130.00-535.00]

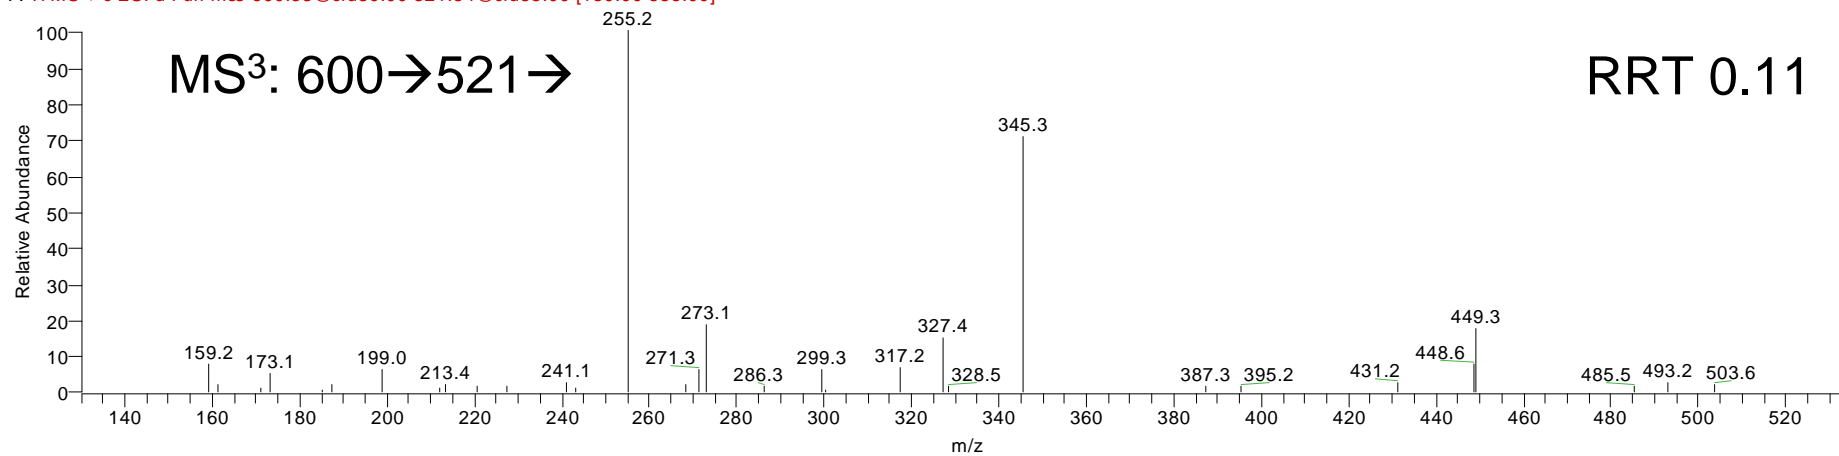

Supplement: NIHMS2295-supplement-Figure_S10.pdf [file NIHMS2295-supplement-Figure_S10.pdf]
