# Supplementary material
Source: PubMed Central journal article supplement (PMC2567817)
Supplement: NIHMS2295-supplement-Table_S1.pdf [file NIHMS2295-supplement-Table_S1.pdf]

**Supplementary Table S1. Sterols and steroids identified in human plasma (in the oxysterol fraction SPE1-Fr-1).**

| Sterol/steroid                     | Oxidised/derivatised sterol/steroid | [M] <sup>+</sup> (m/z) | Retention time/min (relative retention time) <sup>a</sup> | Literature relative retention time <sup>a</sup> ; Sterol/steroid | Relative abundance <sup>b</sup> | Literature value <sup>c</sup> ng/mL [reference] |
|------------------------------------|-------------------------------------|------------------------|-----------------------------------------------------------|------------------------------------------------------------------|---------------------------------|-------------------------------------------------|
| Dehydrocholesterol <sup>d</sup>    | C <sup>4,x</sup> -3-one 3-GP        | 516.3948               | 12.71 (0.98)                                              | 0.90; Desmosterol                                                | In SPE1-Fr-2                    | 500±300 [S1]                                    |
| C <sup>5,x</sup> -3β-ol            |                                     |                        |                                                           | 0.94; 7-Dehydrocholesterol                                       |                                 | 40 – 140 [S2]                                   |
| Cholesterol <sup>d</sup>           | C <sup>4</sup> -3-one 3-GP          | 518.4105               | 12.95 (1.00)                                              | 1.00; Cholesterol                                                | In SPE1-Fr-2                    | 2 x 10 <sup>6</sup> [S3]                        |
| C <sup>5</sup> -3β-ol              |                                     |                        |                                                           |                                                                  |                                 |                                                 |
| 24-Oxocholesterol <sup>e</sup>     | C <sup>4</sup> -3,24-dione 3-GP     | 532.3898               | 7.96 (0.61)                                               | 0.59; 24-Oxocholesterol                                          | 02 – 05                         | NA                                              |
| C <sup>5</sup> -3β-ol-24-one       |                                     |                        |                                                           |                                                                  |                                 |                                                 |
| 6β-Hydroxycholesterol <sup>f</sup> | C <sup>4</sup> -6β-ol-3-one 3-GP    | 534.4054               | 10.71 (0.83)                                              | 0.83; 6β-Hydroxycholesterol                                      | 12 – 17                         | NA                                              |
| C <sup>5</sup> -3β,6β-diol         |                                     |                        |                                                           |                                                                  |                                 |                                                 |
| 7α-Hydroxycholesterol              | C <sup>4</sup> -7α-ol-3-one 3-GP    | 534.4054               | 10.25 (0.79)                                              | 0.80; 7α-Hydroxycholesterol                                      | 02 – 08                         | 43±48 [34]                                      |
| C <sup>5</sup> -3β,7α-diol         |                                     |                        |                                                           |                                                                  |                                 | 44 [35]                                         |

|                                                                                                      |                                   |          |             |                                                      |           |                                                                                                                        |
|------------------------------------------------------------------------------------------------------|-----------------------------------|----------|-------------|------------------------------------------------------|-----------|------------------------------------------------------------------------------------------------------------------------|
|                                                                                                      |                                   |          |             |                                                      |           | 13 - 63 [38]                                                                                                           |
| 27-Hydroxycholesterol<br>C <sup>5</sup> -3 $\beta$ ,27-diol                                          | C <sup>4</sup> -27-ol-3-one 3-GP  | 534.4054 | 8.26 (0.64) | 0.61; 27-Hydroxycholesterol                          | 100 - 100 | 154 $\pm$ 43 [34]<br>159 [35]<br>120 $\pm$ 30 [36]<br>181 $\pm$ 52 <sup>g</sup> [37]<br>139 $\pm$ 35 <sup>h</sup> [37] |
| 24S-Hydroxycholesterol<br>C <sup>5</sup> -3 $\beta$ ,24S-diol                                        | C <sup>4</sup> -24S-ol-3-one 3-GP | 534.4054 | 7.77 (0.60) | 0.59; 24S-Hydroxycholesterol                         | 74 – 81   | 64 $\pm$ 24 [34]                                                                                                       |
|                                                                                                      |                                   |          | 8.01 (0.62) | 0.61; 24S-Hydroxycholesterol                         |           | 83 [35]<br>64 $\pm$ 14 [36]<br>57 $\pm$ 13 <sup>g</sup> [37]<br>63 $\pm$ 13 <sup>h</sup> [37]                          |
| 3 $\beta$ -Hydroxycholesta-5,24-dien-27-oic acid <sup>i,p</sup><br>CA <sup>5,24</sup> -3 $\beta$ -ol | CA <sup>4,24</sup> -3-one 3-GP    | 546.3690 | 7.86 (0.61) | NA; 3 $\beta$ -Hydroxycholesta-5,24-dien-27-oic acid | 19 – 51   | NA                                                                                                                     |
| 3 $\beta$ -Hydroxycholest-5-en-27-oic acid <sup>p</sup><br>CA <sup>5</sup> -3 $\beta$ -ol            | CA <sup>4</sup> -3-one 3-GP       | 548.3847 | 8.08 (0.62) | 0.62; 3 $\beta$ -Hydroxycholest-5-en-27-oic acid     | 163 - 227 | 118 [35]<br>67 $\pm$ 28 [39]<br>75 [40]                                                                                |

|                                                                                                                       |                                                |          |                            |                                                              |                          |                                                    |
|-----------------------------------------------------------------------------------------------------------------------|------------------------------------------------|----------|----------------------------|--------------------------------------------------------------|--------------------------|----------------------------------------------------|
| 7 $\alpha$ ,27-Dihydroxycholesterol<br>C <sup>5</sup> -3 $\beta$ ,7 $\alpha$ ,27-triol                                | C <sup>4</sup> -7 $\alpha$ ,27-diol-3-one 3-GP | 550.4003 | 6.72 (0.52)                | 0.49: 7 $\alpha$ ,27-Dihydroxycholesterol                    | 11 – 22                  | NA                                                 |
| 3 $\beta$ ,5 $\beta$ -Dihydroxy-B-norcholestane-6 $\beta$ -carboxyaldehyde<br>Aldol <sup>j</sup>                      | Aldol 6-GP <sup>k</sup>                        | 552.4160 | 10.24 (0.79)               | 0.79: Aldol                                                  | 07 – 18                  | <4 [41]                                            |
| 3 $\beta$ ,7 $\alpha$ -Dihydroxycholest-5-en-27-oic acid <sup>p</sup><br>CA <sup>5</sup> -3 $\beta$ ,7 $\alpha$ -diol | CA <sup>4</sup> -7 $\alpha$ -ol-3-one 3-GP     | 564.3796 | 6.55 (0.51)<br>7.20 (0.56) | NA; 3 $\beta$ ,7 $\alpha$ -Dihydroxycholest-5-en-27-oic acid | 97 - 224                 | 39±26 [39]<br>(121°) [39]<br>24 [40]<br>(52°) [40] |
| Androstan-3-ol-17-one 3-glucuronide <sup>L,m,p</sup><br>A-3-ol-17-one 3-GlcA                                          | A-3-ol-17-one 3-GlcA<br>17-GP <sup>k</sup>     | 600.3279 | 1.38 (0.11)                | NA: Etiocholanolone 3-glucuronide <sup>m</sup>               | 118 - 577                | 51.7±7.5 [49]                                      |
| Androstan-3-ol-17-one 3-sulphate <sup>L,m,p</sup><br>A-3-ol-17-one 3-sulphate                                         | A-3-ol-17-one 3-sulphate 17-GP <sup>k</sup>    | 504.2527 | 0.82 (0.06)                | NA: Epiandrosterone 3-sulphate <sup>m</sup>                  | 148 - 936 <sup>m,n</sup> | [50]                                               |
|                                                                                                                       |                                                |          | 1.22 (0.09)                | NA: Androsterone 3-sulphate <sup>m</sup>                     | 577 - 955 <sup>m,n</sup> | [50]                                               |
| Dehydroepiandrosterone                                                                                                | A <sup>5</sup> -3 $\beta$ -ol-17-one 3-        | 502.2370 | 0.76 (0.06)                | NA: Dehydroepiandrosterone 3-                                | 3140 - 3970 <sup>n</sup> | 1501 [46]                                          |

|                                         |                             |  |  |          |  |                  |
|-----------------------------------------|-----------------------------|--|--|----------|--|------------------|
| (DHEA) 3-sulphate <sup>L,p</sup>        | sulphate 17-GP <sup>k</sup> |  |  | sulphate |  | 1030±626 [47]    |
| A <sup>5</sup> -3β-ol-17-one 3-sulphate |                             |  |  |          |  | 1950 – 3312 [48] |

<sup>a</sup> Retention time in min, relative retention time on a scale with C<sup>4</sup>-3-one 3-GP being 1.00. Literature relative retention times from reference 24.

<sup>b</sup> Abundance relative to C<sup>4</sup>-27-ol-3-one 3-GP (100). Abundance based on ion count.

<sup>c</sup> Values in parenthesis represent combined values for the 3β-ol-5-ene and 3-oxo-4-ene sterols in plasma.

<sup>d</sup> Found predominantly in SPE1-Fr-2.

<sup>e</sup> MS<sup>n</sup> data indicates the oxo group is on the C-17 side-chain, retention time data suggests C-24.

<sup>f</sup> This may be an artefact from the oxidation/derivatisation of C-3β,5α,6β-triol.

<sup>g</sup> Data for males.

<sup>h</sup> Data for females.

<sup>i</sup> MS<sup>n</sup> data suggests the additional unsaturation is in the C-17 side-chain, probably at C-24.

<sup>j</sup> The 6-oxo group reacts with GP reagent.

<sup>k</sup> Not oxidised. The cholesterol oxidase enzyme from *Streptomyces* has poor activity towards C<sub>19</sub> and C<sub>21</sub> steroids. To oxidise these steroids the enzyme from *Brevibacterium* is recommended.

<sup>l</sup> The 17-oxo group reacts with the GP reagent.

<sup>m</sup> Etiocholanolone 3-glucuronide, androsterone 3-sulphate and epiandrosterone 3-sulphate are known constituents of human plasma<sup>49,50</sup>. The order of elution of the two 3-sulphates isomers has not been established, but it is likely that the epi isomer should be eluted first.

<sup>n</sup> Experimental value provides an underestimation on account of “in-source” fragmentation. See supplementary Results.

<sup>p</sup> Bile acids and acidic sterol and steroid conjugates (sulphates and glucuronides) can be analysed without oxidation/derivatisation by negative-ion ESI.
