# Supplementary material
Source: PubMed Central journal article supplement (PMC2567817)
Supplement: NIHMS2295-supplement-Table_S2.pdf [file NIHMS2295-supplement-Table_S2.pdf]

**Supplementary Table S2. Data dependent settings for analysis on the LTQ-Orbitrap**

| Parent-ion mass | Neutral loss | Parent-ion structure                            | Parent molecule before oxidation/derivatisation                         |
|-----------------|--------------|-------------------------------------------------|-------------------------------------------------------------------------|
| 516.3948        | 79.04        | C <sup>4,x</sup> -3-one 3-GP                    | Desmosterol/7-Dehydrocholesterol                                        |
| 518.4105        | 79.04        | C <sup>4</sup> -3-one 3-GP                      | Cholesterol                                                             |
| 520.4261        | 79.04        | C-3-one 3-GP                                    | 3 $\beta$ -Hydroxycholestane                                            |
| 532.3898        | 79.04        | C <sup>4</sup> -3,x-dione 3-GP                  | Oxcholesterol                                                           |
| 534.4054        | 79.04        | C <sup>4</sup> -ol-3-one 3-GP                   | Hydroxycholesterol                                                      |
| 536.4211        | 79.04        | C-ol-3-one 3-GP                                 | Dihydroxycholestane                                                     |
| 546.3690        | 79.04        | CA <sup>4,x</sup> -3-one 3-GP                   | 3 $\beta$ -Hydroxycholestadienoic acid                                  |
| 548.3847        | 79.04        | CA <sup>4</sup> -3-one 3-GP                     | 3 $\beta$ -Hydroxycholestenoic acid                                     |
| 550.4003        | 79.04        | C <sup>4</sup> -diol-3-one 3-GP                 | Dihydroxycholesterol                                                    |
| 552.4160        | 79.04        | C-diol-3-one 3-GP<br>5,6-seco-sterol/aldol 3-GP | Trihydroxycholestane<br>3 $\beta$ -hydroxy-5-oxo-5,6-secocholestan-6-al |
| 560.3483        | 79.04        | CA <sup>4,x,y</sup> -ol-3-one 3-GP              | Dihydroxycholestatrienoic acid                                          |
| 562.3639        | 79.04        | CA <sup>4,x</sup> -ol-3-one 3-GP                | Dihydroxycholestadienoic acid                                           |
| 564.3796        | 79.04        | CA <sup>4</sup> -ol-3-one 3-GP                  | Dihydroxycholestenoic acid                                              |
| 566.3592        | 79.04        | C <sup>4</sup> -triol-3-one 3-GP                | Trihydroxycholesterol                                                   |
| 568.4109        | 79.04        | C-triol-3-one 3-GP                              | Tetrahydroxycholestane                                                  |
