# Supplementary material
Source: PubMed Central journal article supplement (PMC2567817)
Supplement: NIHMS2295-supplement-Table_S3.pdf [file NIHMS2295-supplement-Table_S3.pdf]

**Supplementary Table S3. Phospholipids identified in the “oxysterol window” of the plasma metabolome**

| Measured <i>m/z</i> (RA <sup>a</sup> ) | Retention time/min | Elemental composition                             | Lipid Maps hit <sup>b</sup>      | Metlin Library hit <sup>c,d</sup>   | Measured MS <sup>2</sup> fragments (RA)                             | Postulated structure |
|----------------------------------------|--------------------|---------------------------------------------------|----------------------------------|-------------------------------------|---------------------------------------------------------------------|----------------------|
| 494.3240<br>(3.75)                     | 9.52               | C <sub>24</sub> H <sub>49</sub> O <sub>7</sub> NP | GPCho 16:1(9Z)/0:0               | GPCho 16:1(9E)/0:0 <sup>d</sup>     | 476 (100), 417<br>(0.86), 184 (33.4)                                | GPCho<br>16:1/0:0    |
| 496.3402<br>(100)                      | 10.57              | C <sub>24</sub> H <sub>51</sub> O <sub>7</sub> NP | GPCho 16:0/0:0<br>GPEtn 19:0/0:0 | GPCho 16:0/0:0 <sup>d</sup>         | 478 (100), 419<br>(0.30), 313 (0.13),<br>258 (0.52), 184<br>(29.27) | GPCho<br>16:0/0:0    |
| 520.3400<br>(58.26)                    | 10.02              | C <sub>26</sub> H <sub>51</sub> O <sub>7</sub> NP | GPCho 18:2(9Z,12Z)/0:0           | GPCho 18:2(9Z,12Z)/0:0 <sup>d</sup> | 502 (100), 443<br>(0.26), 337 (0.11),<br>258 (0.61), 184<br>(29.60) | GPCho<br>18:2/0/0    |
| 522.3553<br>(32.38)                    | 10.99              | C <sub>26</sub> H <sub>53</sub> O <sub>7</sub> NP | GPCho 18:1(9Z)/0:0               | GPCho 18:1(9Z)/0:0 <sup>d</sup>     | 504 (100), 339<br>(0.47), 258 (0.83),<br>184 (28.21)                | GPCho<br>18:1/0:0    |
| 524.3711                               | 12.52              | C <sub>26</sub> H <sub>55</sub> O <sub>7</sub> NP | GPCho 18:0/0:0                   | GPCho 18:0/0:0 <sup>d</sup>         | 506 (100), 447                                                      | GPCho                |

|                    |       |                                                   |                                          |                                                       |                                                      |                   |
|--------------------|-------|---------------------------------------------------|------------------------------------------|-------------------------------------------------------|------------------------------------------------------|-------------------|
| (23.39)            |       |                                                   |                                          |                                                       | (0.37), 341 (0.30),<br>258 (0.46), 184<br>(24.53)    | 18:0/0:0          |
| 544.3395<br>(9.34) | 9.95  | C <sub>28</sub> H <sub>51</sub> O <sub>7</sub> NP | GPCho 20:4(5Z,8Z,11Z,14Z)/0:0            | GPCho 20:4(5Z,8Z,11Z,14Z)/0:0 <sup>d</sup>            | 526 (100), 467<br>(0.25), 258 (0.32),<br>184 (27.49) | GPCho<br>20:4/0:0 |
| 568.3400<br>(1.26) | 9.90  | C <sub>30</sub> H <sub>51</sub> O <sub>7</sub> NP | GPCho<br>22:6(4Z,7Z,10Z,13Z,16Z,19Z)/0:0 | GPCho<br>22:6(4E,7E,10E,13E,16E,19E)/0:0 <sup>c</sup> | 550 (100), 385<br>(3.03), 184<br>(19.43)             | GPCho<br>22:6/0:0 |
| 570.3556<br>(0.56) | 10.34 | C <sub>30</sub> H <sub>53</sub> O <sub>7</sub> NP | NA                                       | NA                                                    | NA                                                   | GPCho<br>22:5/0:0 |

<sup>a</sup> Relative abundance as determined by peak area.

<sup>b</sup> From a search of *m/z* value against the Lipid Maps<sup>S4</sup> database <http://www.lipidmaps.org/tools/index.html>

PGCho x:y/x:y is an abbreviation for glycerophosphocholine where the number of carbons in the acyl chains are indicated by x and the number of double bonds by y.

<sup>c</sup> From a search of *m/z* against the METLIN metabolite library<sup>17</sup> <http://metlin.scripps.edu/index.php>.

<sup>d</sup> From a search of M against the METLIN metabolite library<sup>17</sup> <http://metlin.scripps.edu/index.php>
