# Supplementary material
Source: PubMed Central journal article supplement (PMC2567817)

**Fig. S3**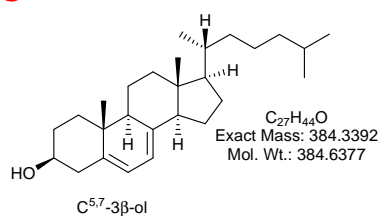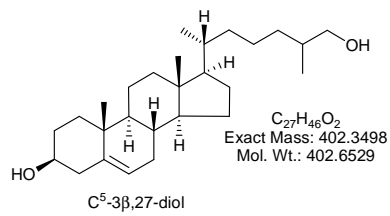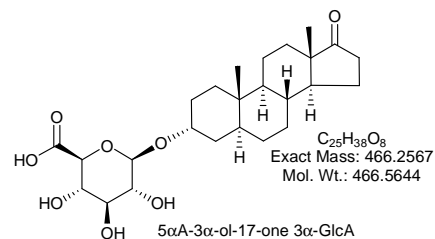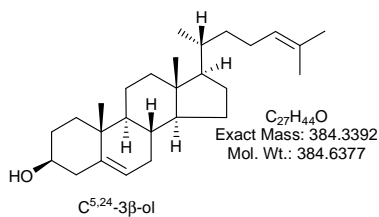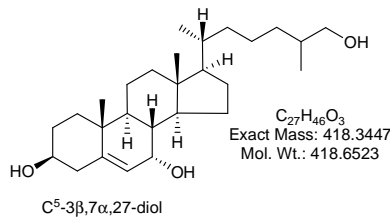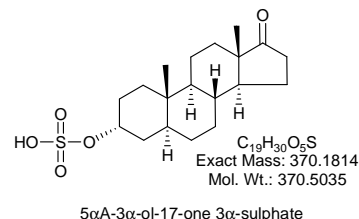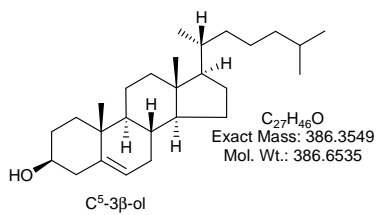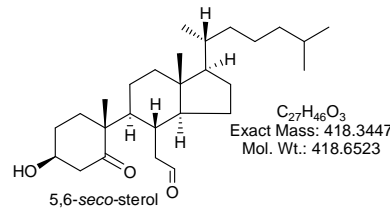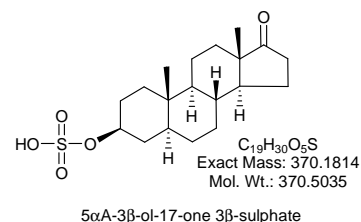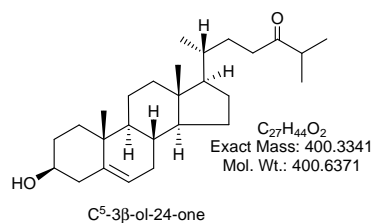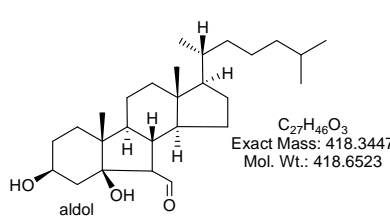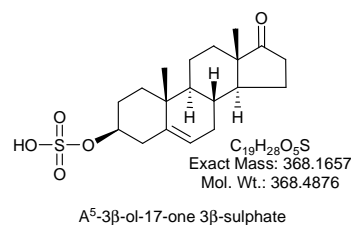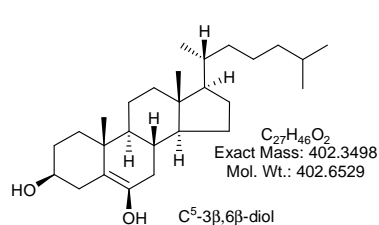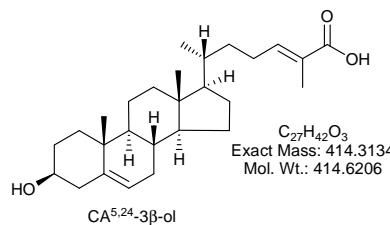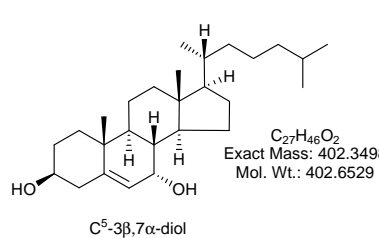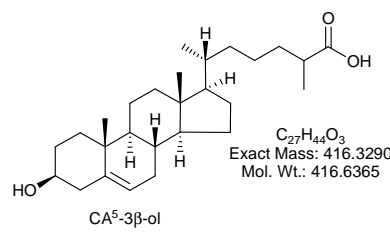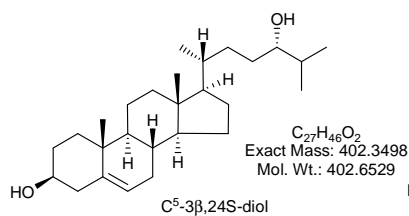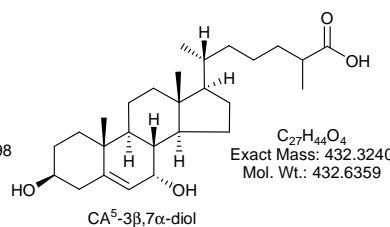

Supplement: NIHMS2295-supplement-Figure_S3.pdf [file NIHMS2295-supplement-Figure_S3.pdf]

**Fig. S5a**

RT: 0.00 - 16.99

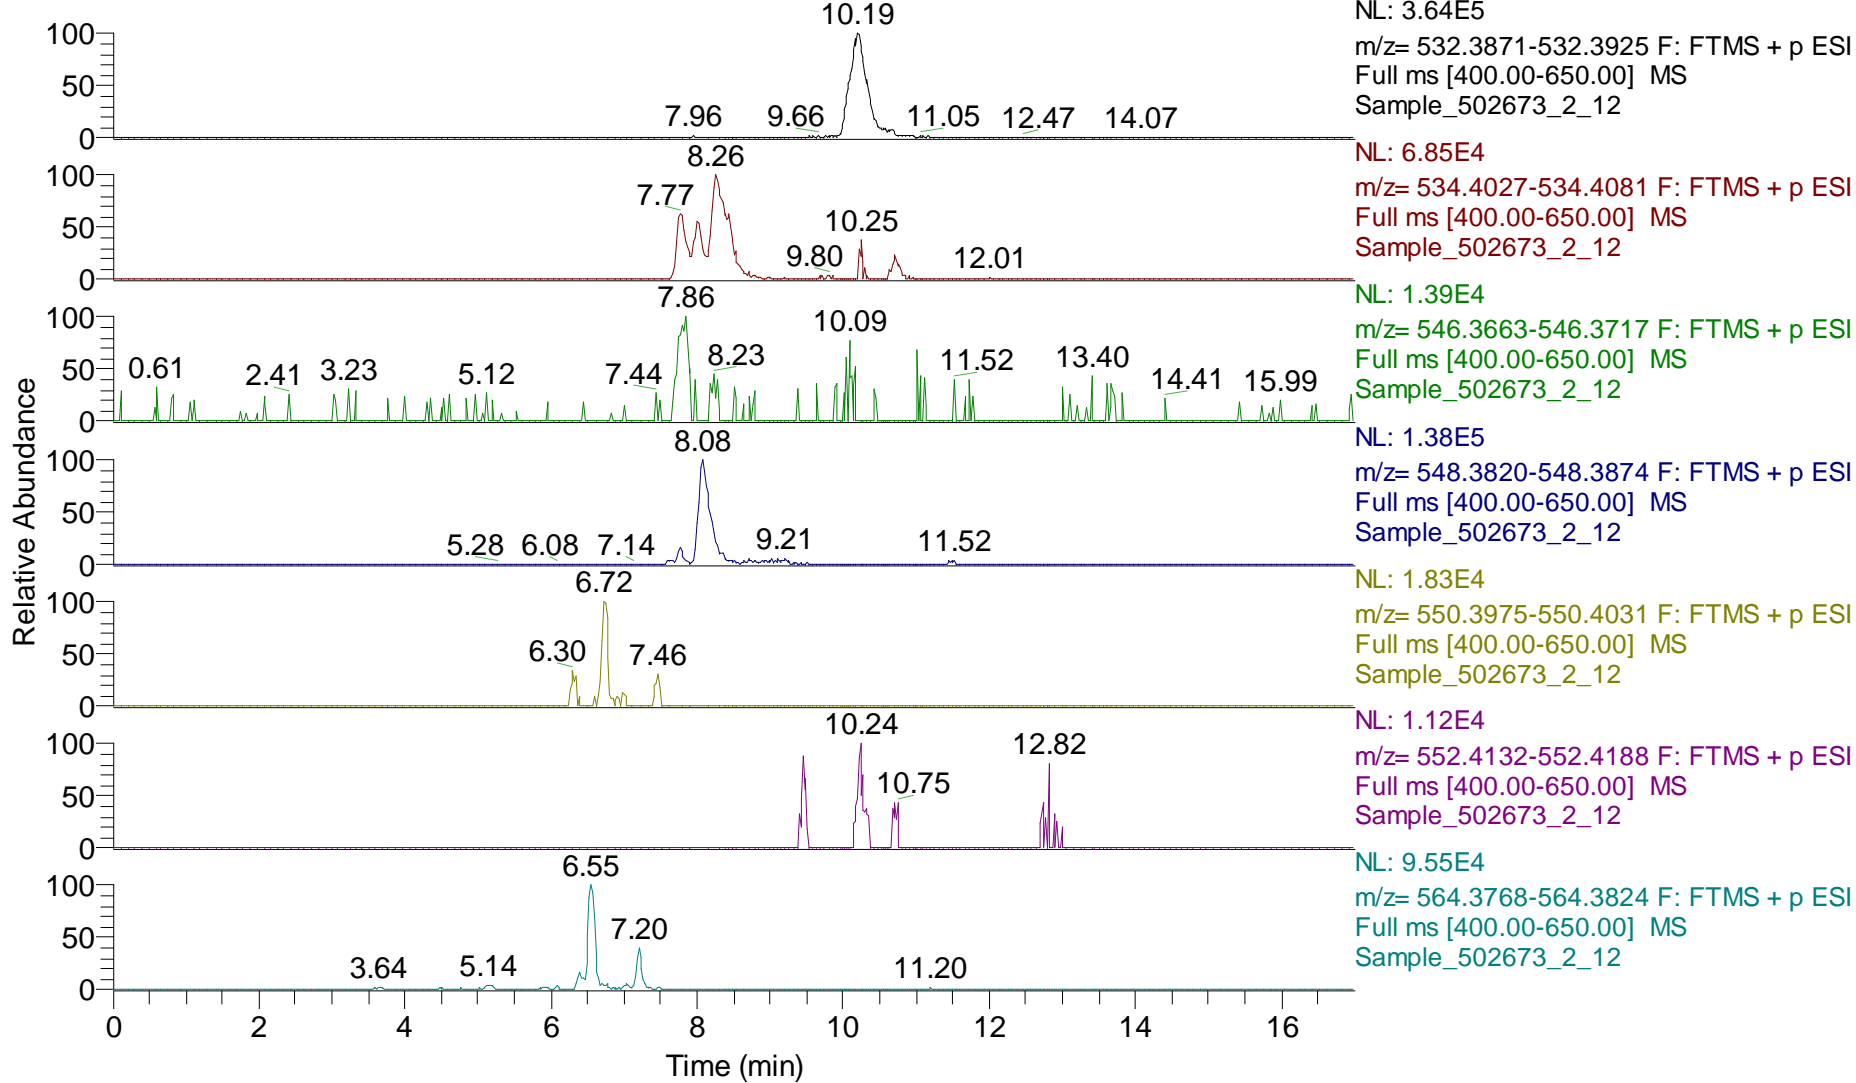

**Fig. S5b**

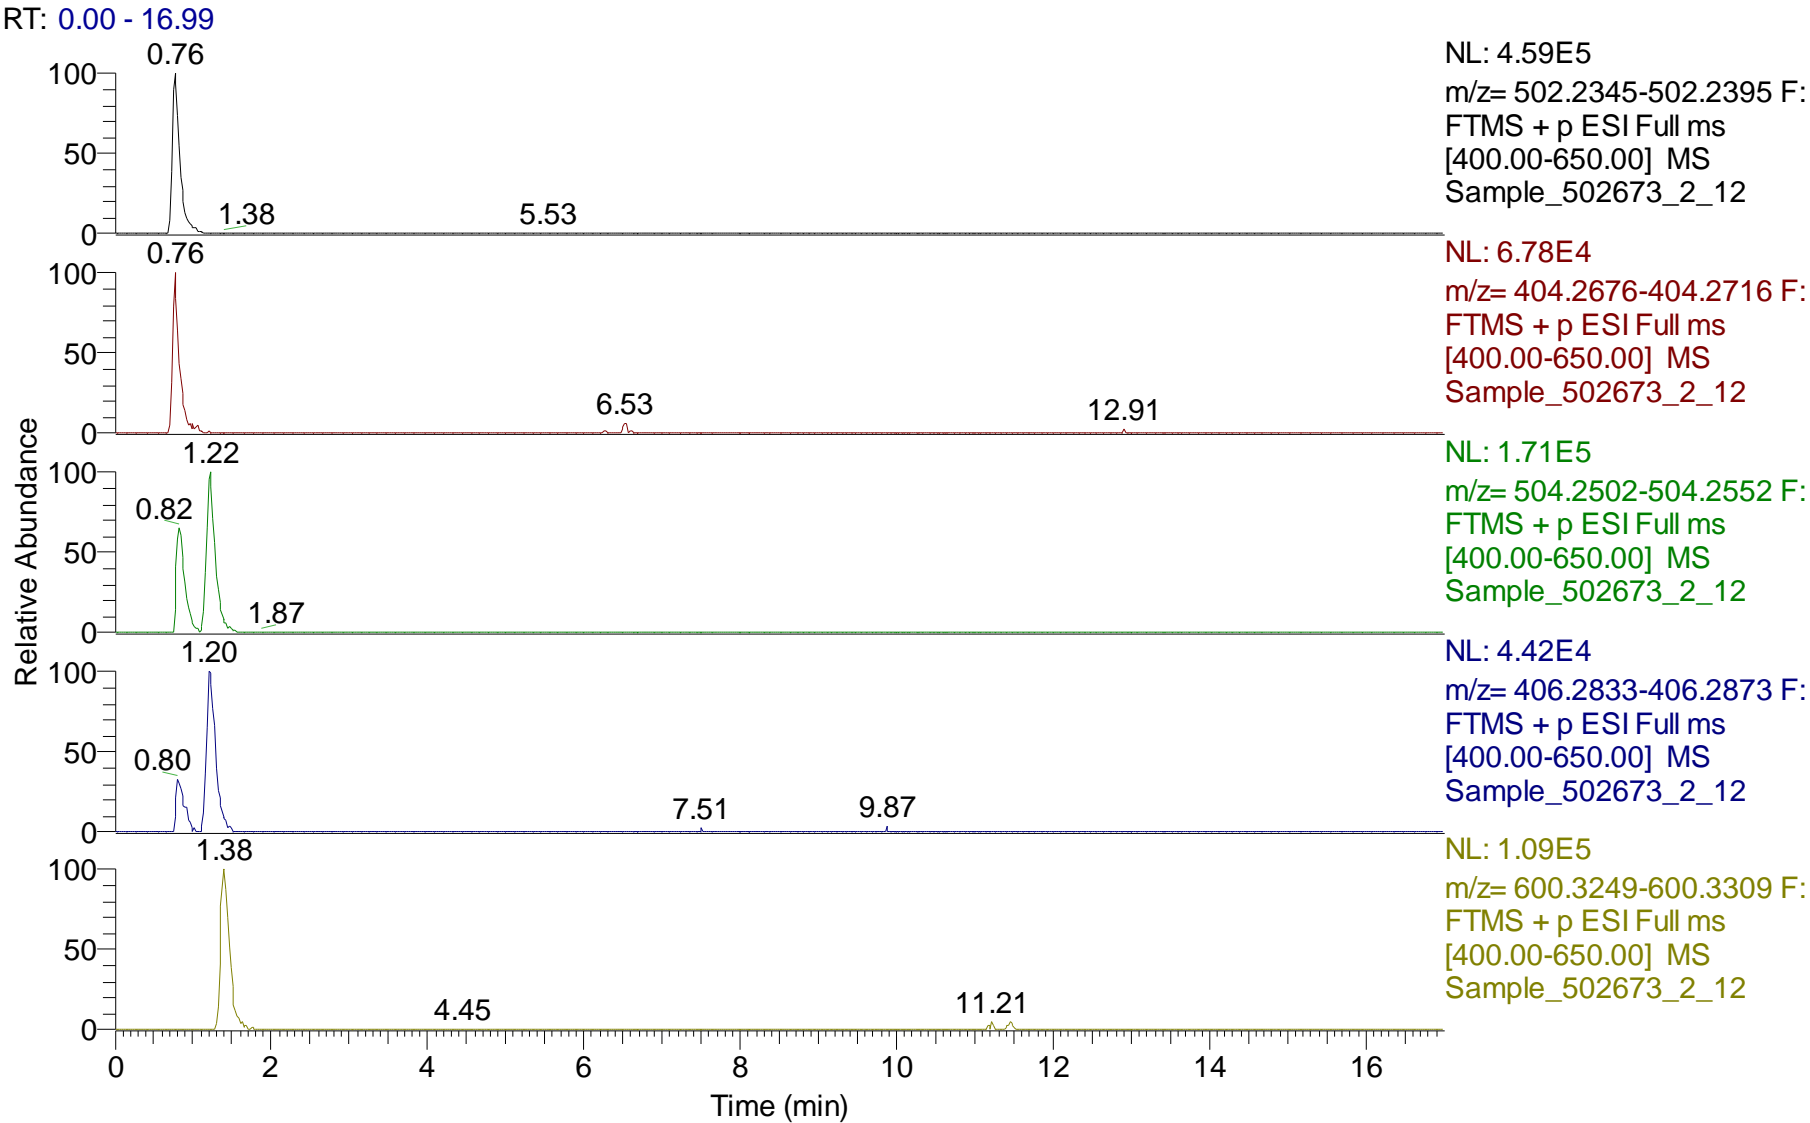

Supplement: NIHMS2295-supplement-Figure_S5.pdf [file NIHMS2295-supplement-Figure_S5.pdf]

**Fig. S6a**

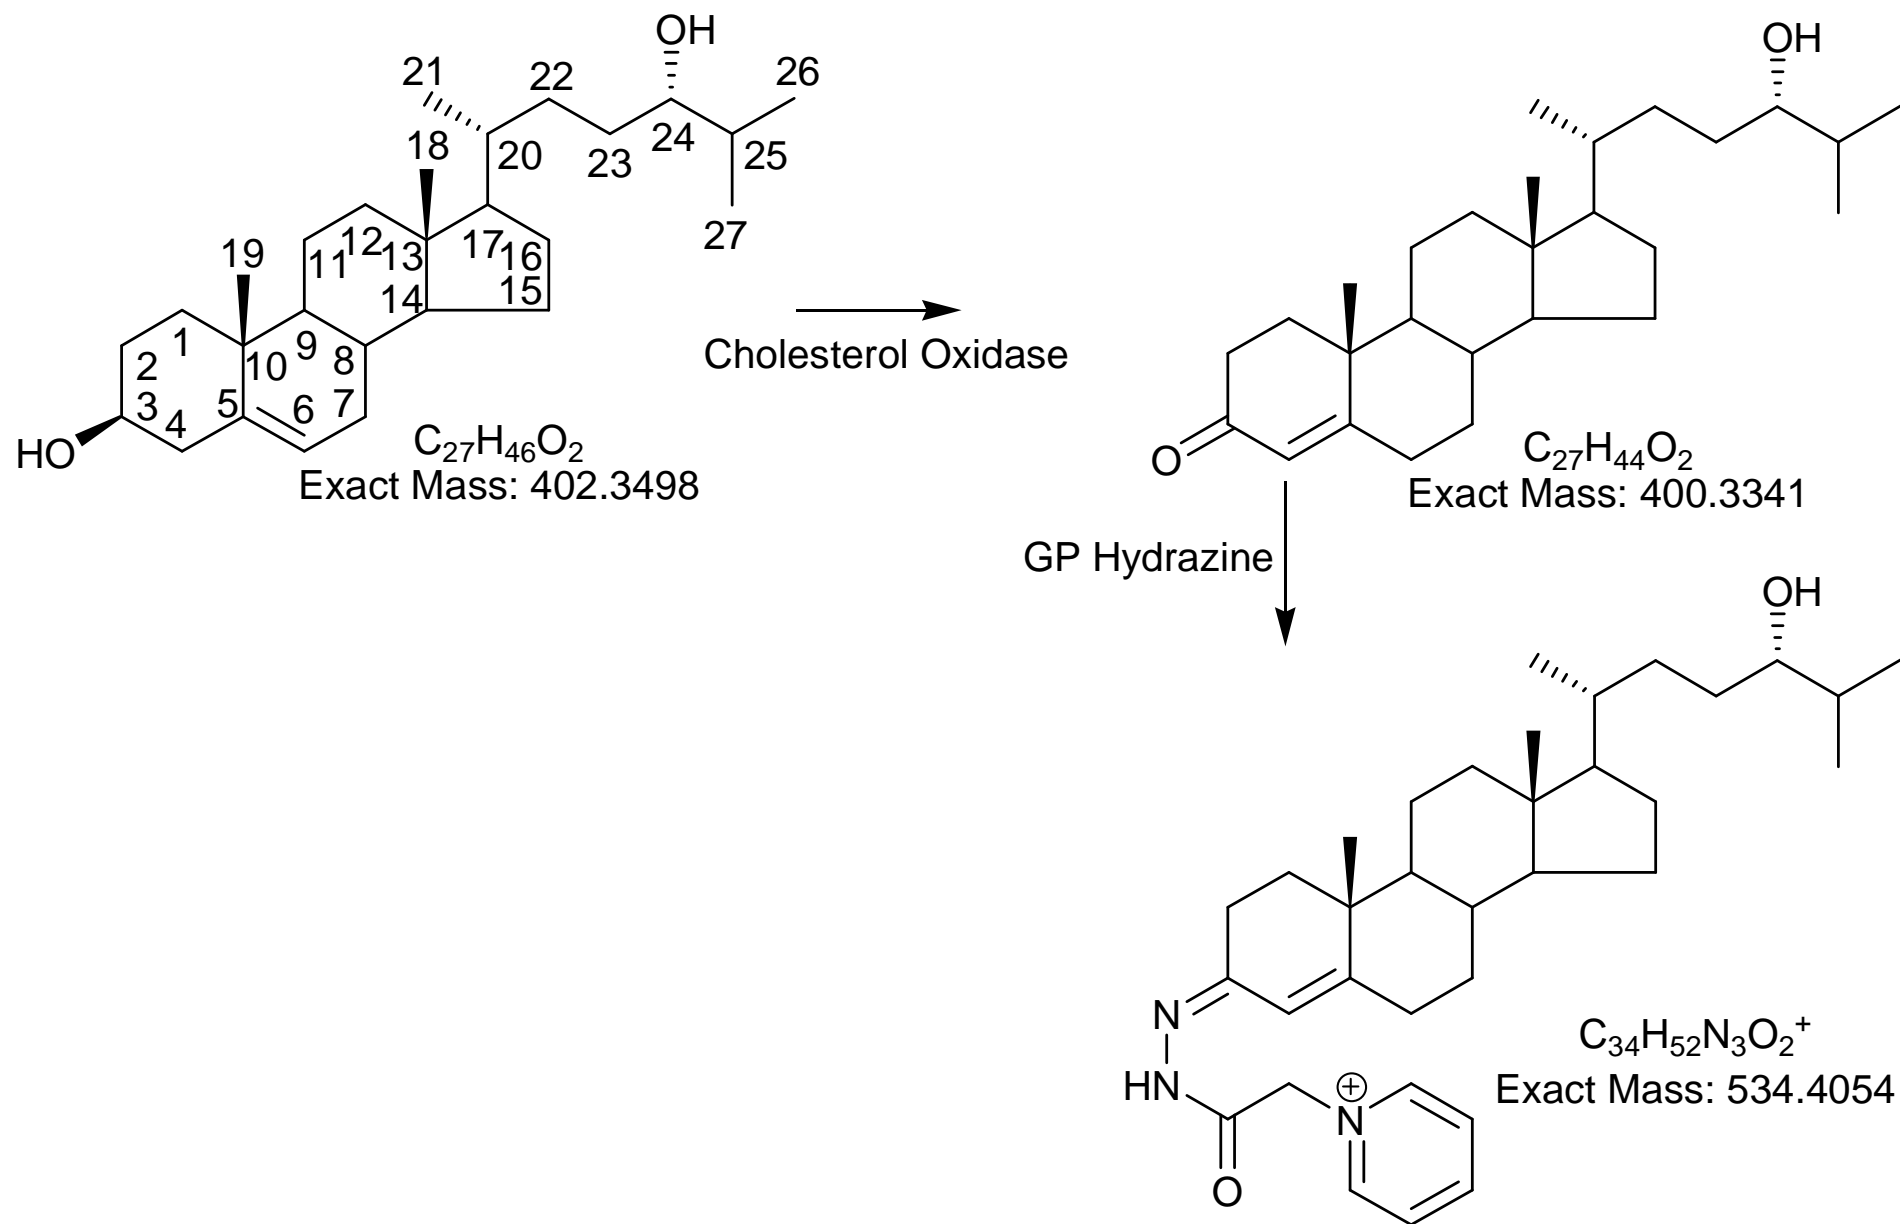

**Fig. S6b**

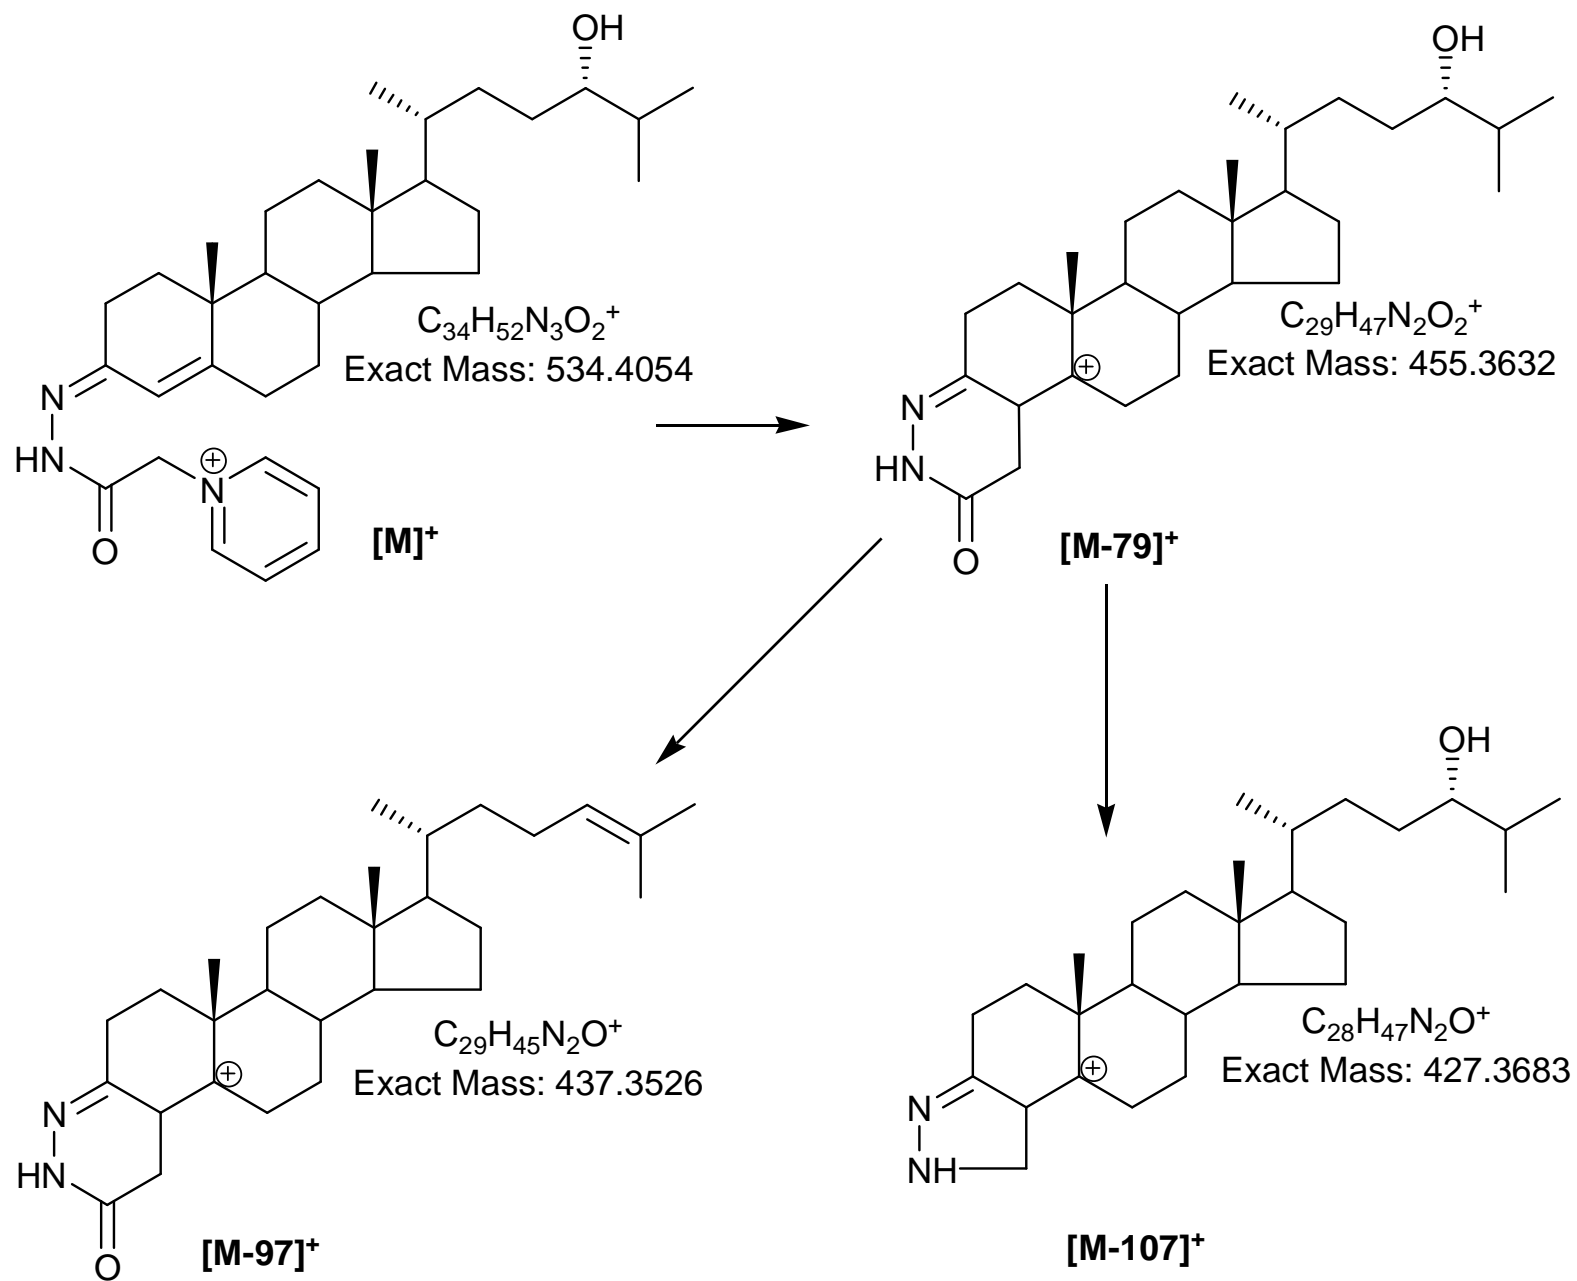

**Fig. S6c**

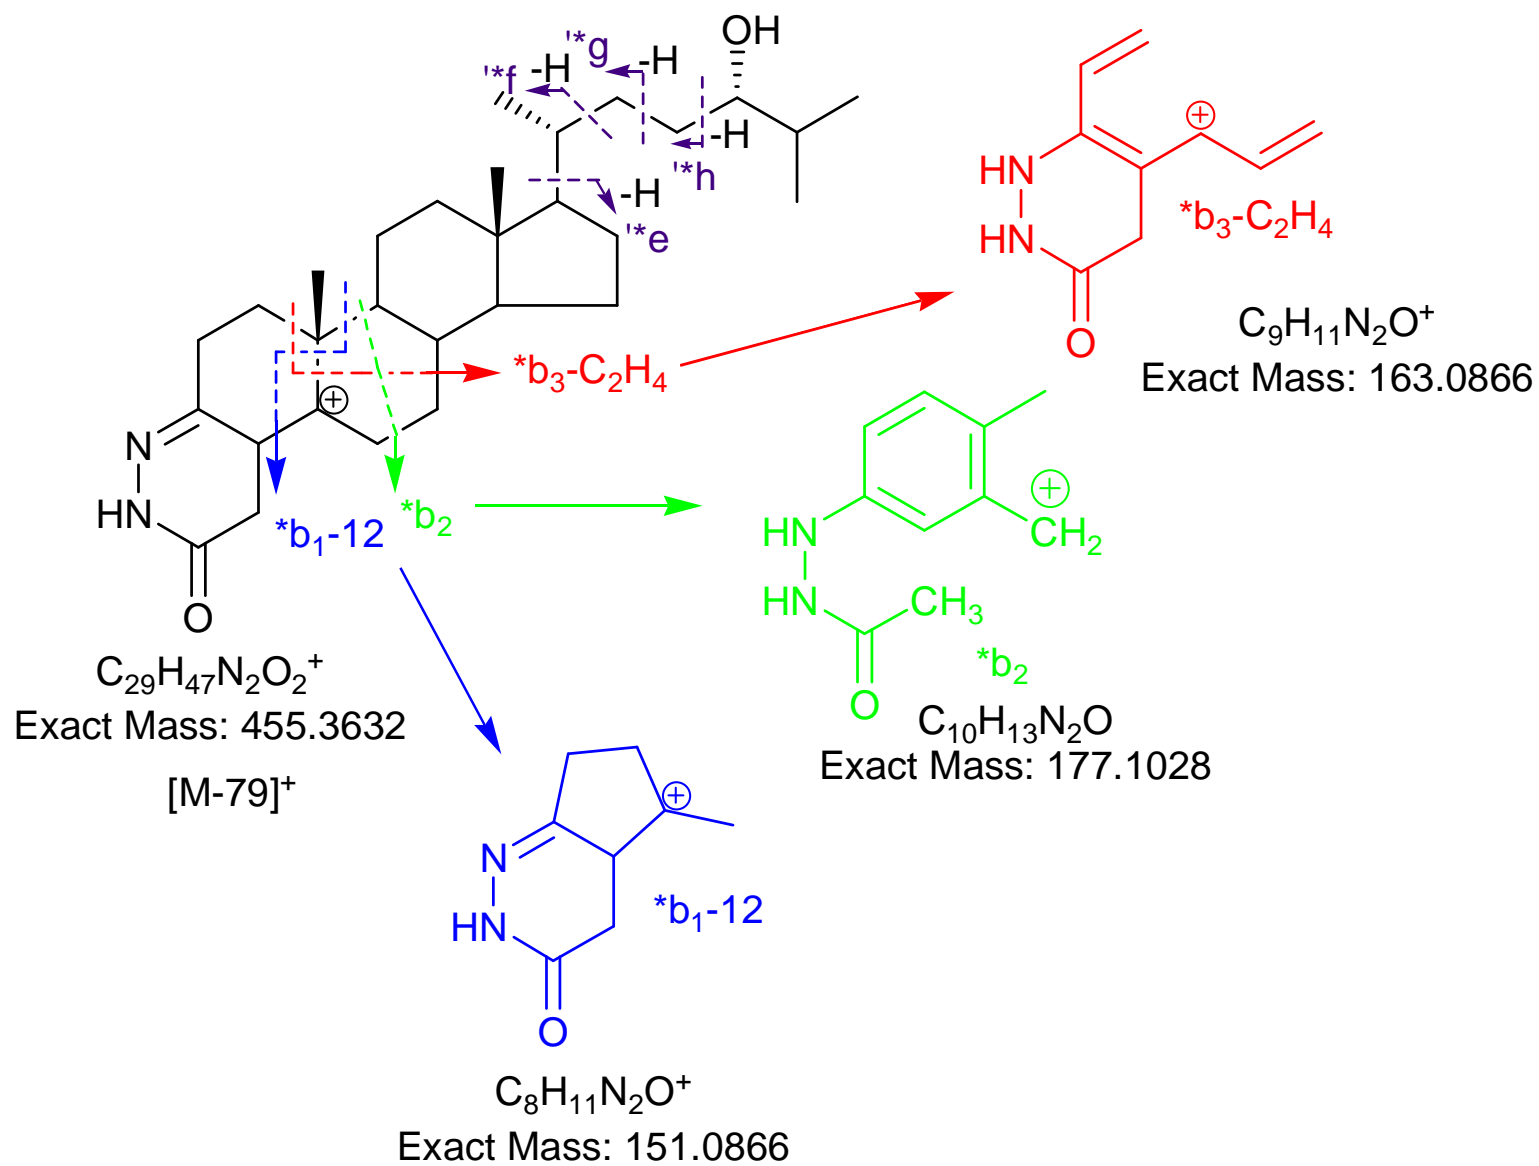

Supplement: NIHMS2295-supplement-Figure_S6.pdf [file NIHMS2295-supplement-Figure_S6.pdf]
